# Supplementary material for: Potential tourmaline reference materials for microbeam B and Sr isotopic analyses
Source: Royal Society of Chemistry journal article supplement (doi:10.1039/d3ja00395g), 2024-01-01
Supplement: d3ja00395g2.xlsx [file d3ja00395g2.xlsx]

## Sheet: Table S1
Table S1 Major elements (wt%) of the GIG-1,XJ-1 and XJ-3 touurmalines analyzed by EPMA.
	GIGT
Sample No.	1	2	3	4	5	6	7	8	9	10	11	12	13	14	15	16	17	18	19	20	21	22	23	24	25	26	27	28	29	30	31	32	33	34	35	36	37	38	39	40	41	42	43	44	45	46	47	48	49
Na2O	2.3319	2.3511	2.4399	2.3878	2.415	2.4005	2.3598	2.331	2.3682	2.3932	2.3815	2.3978	2.3538	2.3365	2.3616	2.3583	2.4011	2.3506	2.3604	2.2951	2.3412	2.3582	2.3181	2.3438	2.3922	2.3962	2.3052	2.3257	2.335	2.3352	2.3155	2.2963	2.3312	2.3722	2.2912	2.3719	2.3852	2.4169	2.3329	2.3576	2.3413	2.3472	2.2533	2.3794	2.3467	2.3552	2.3411	2.4008	2.4025
SiO2	37.9265	37.861	37.9472	37.9949	37.96	37.7639	37.5906	37.8101	37.9722	37.7489	37.7539	37.81	38.0148	37.7232	37.8255	37.8332	37.7847	37.8391	37.8706	37.9337	37.8753	37.8914	37.6045	37.7716	37.8216	37.9122	38.0155	37.9305	37.9613	37.9503	37.774	37.8783	38.0415	37.9021	37.9121	37.7704	37.7974	37.645	37.877	37.793	38.1012	37.9032	38.0482	37.958	38.1711	38.0348	37.954	37.9835	38.107
Al2O3	34.4371	34.3449	34.3784	34.287	34.2925	34.1634	34.322	34.2081	34.4062	34.4453	34.2268	34.3699	34.4967	34.2129	34.365	34.2968	34.1322	34.4537	34.2842	34.4299	34.4052	34.67	34.2285	34.2807	34.4118	34.0515	34.6039	34.4662	34.5013	34.4943	34.4256	34.3756	34.5146	34.3062	34.4335	34.5317	34.5723	34.5069	34.4821	34.6268	34.4867	34.1371	34.3387	34.1108	34.3318	34.3787	34.4226	34.412	34.5145
MgO	8.4313	8.424	8.624	8.6996	8.6032	8.5171	8.545	8.552	8.6444	8.4105	8.4847	8.5192	8.4627	8.3808	8.5868	8.4913	8.498	8.4862	8.3433	8.4617	8.4118	8.41	8.3911	8.477	8.329	8.6608	8.4839	8.4106	8.4199	8.4545	8.3451	8.4482	8.4789	8.4242	8.3633	8.431	8.4329	8.3947	8.5457	8.4458	8.3916	8.5212	8.5488	8.5762	8.6489	8.6121	8.5363	8.62	8.4876
FeO	3.5793	3.3993	3.3698	3.4731	3.3631	3.4446	3.414	3.419	3.4977	3.3839	3.4438	3.4335	3.4991	3.4376	3.3951	3.5388	3.4041	3.5119	3.4294	3.5629	3.4447	3.5714	3.4507	3.5916	3.467	3.54	3.467	3.4558	3.5223	3.5075	3.5063	3.5361	3.5421	3.4553	3.5083	3.5208	3.4473	3.4523	3.5348	3.4103	3.5309	3.5979	3.7036	3.4253	3.4245	3.4026	3.4866	3.4879	3.439
MnO	0.0044	0.0065	0.012	0.0134	0.0175	0	0.0198	0.0013	0.0068	0.0068	0.0099	0	0.0001	0.0061	0.0157	0.0111	0.022	0.0213	0.0023	0.0035	0.0196	0.0221	0	0.0129	0.007	0.0277	0	0	0	0.006	0.0168	0.0061	0	0.0275	0.0018	0.0255	0.0185	0	0.0032	0.0057	0.007	0.0221	0	0.0239	0.0049	0.0017	0.018	0	0.0071
F	0.095	0.0881	0.0836	0.0912	0.0857	0.0948	0.0813	0.0991	0.0911	0.0926	0.0894	0.0946	0.0786	0.1078	0.0896	0.093	0.0933	0.099	0.0886	0.1081	0.0774	0.1056	0.1136	0.0879	0.0794	0.0777	0.0886	0.0898	0.0935	0.0892	0.0741	0.0812	0.0892	0.112	0.1037	0.0898	0.0882	0.0903	0.0955	0.073	0.0873	0.1001	0.1101	0.0918	0.1036	0.0996	0.0748	0.0917	0.0904
TiO2	0.5246	0.3937	0.4122	0.441	0.4416	0.5016	0.4676	0.4817	0.5153	0.4539	0.4968	0.4928	0.4843	0.4907	0.4887	0.4725	0.4771	0.5087	0.5081	0.4771	0.5349	0.5162	0.5112	0.4956	0.4606	0.478	0.4891	0.479	0.4857	0.4801	0.4802	0.5232	0.4586	0.5099	0.5466	0.5352	0.4877	0.5175	0.4447	0.4524	0.4605	0.5192	0.5352	0.4279	0.3944	0.4244	0.4871	0.5046	0.5179
K2O	0.0114	0.015	0.002	0.0152	0.0235	0.027	0.0001	0.0027	0.0107	0.028	0.0187	0.0192	0.0208	0.0286	0.0259	0.0104	0	0.0259	0.0026	0.0024	0.0078	0.0307	0.0135	0.0075	0.009	0.031	0	0.0292	0.0054	0.0173	0.0195	0.0028	0.0046	0.0254	0.0151	0.0101	0.0288	0.0277	0.0059	0.0093	0.0066	0.0093	0.022	0.0154	0.0227	0.0101	0.0098	0.0192	0.0226
CaO	0.2413	0.2723	0.2782	0.2858	0.2611	0.2687	0.2746	0.2583	0.2471	0.2456	0.2552	0.2406	0.2468	0.2805	0.2504	0.2689	0.2668	0.2613	0.2532	0.242	0.2457	0.2562	0.2862	0.2396	0.2398	0.2022	0.232	0.2723	0.246	0.2575	0.2532	0.274	0.2601	0.2447	0.2627	0.2498	0.27	0.2478	0.2618	0.2563	0.2524	0.3508	0.3261	0.2942	0.2604	0.2788	0.2833	0.2646	0.2477
Cl	0	0	0.0045	0.0016	0.0009	0.0035	0	0	0.0131	0.0055	0.0056	0.0019	0.0032	0	0.0112	0.005	0	0	0.0088	0	0	0.0019	0.0009	0.0096	0	0	0.0114	0	0.0035	0.0048	0.006	0.0106	0.0116	0.0122	0.0143	0.0123	0	0	0	0	0	0.0044	0	0	0.0003	0	0	0.005	0
Total	87.5826	87.1559	87.5517	87.6904	87.4641	87.1853	87.0748	87.1632	87.7728	87.2141	87.1662	87.3796	87.6609	87.0046	87.4156	87.3792	87.0792	87.5576	87.1514	87.5164	87.3637	87.8336	86.9183	87.3178	87.2175	87.3773	87.6967	87.4591	87.574	87.5967	87.2162	87.4324	87.7324	87.3918	87.4527	87.5484	87.5282	87.299	87.5836	87.4301	87.6656	87.5123	87.8861	87.303	87.7092	87.5981	87.6136	87.7894	87.8362
B2O3*	11.0196	10.9958	11.0359	11.039	11.0229	10.9731	10.9622	10.9776	11.0399	10.9911	10.9732	11.0009	11.0425	10.9574	11.0048	10.9971	10.9684	11.0152	10.9829	11.0173	11.0025	11.0466	10.94	10.9821	10.9936	10.9911	11.048	11.0206	11.0296	11.0314	10.9859	11.0038	11.05	11.0005	11.0072	11.0103	11.0207	10.9866	11.0262	11.02	11.0492	11.0017	11.0427	11.0012	11.0587	11.0416	11.0321	11.0455	11.0634
	XJ-1
Sample No.	1	2	3	4	5	6	7	8	9	10	11	12	13	14	15	16	17	18	19	20	21	22	23	24	25	26	27	28	29	30	31	32	33	34	35	36	37	38	39	40
F	0	0	0	0	0	0	0	0	0	0.003	0.005	0	0.01	0	0	0	0	0.037	0.004	0	0.023	0.028	0	0.006	0	0	0	0.005	0.021	0.02	0.005	0	0	0	0	0	0	0.01	0	0.04
MgO	7.389	7.3	7.357	7.492	7.308	7.35	7.381	7.483	7.495	7.72	7.788	7.66	7.853	7.8	7.65	7.754	7.825	7.83	8.023	8.126	7.811	7.791	7.823	7.704	7.712	7.764	7.682	7.681	7.936	7.903	7.81	7.807	7.95	7.967	8.031	7.827	7.854	7.92	8.024	8.084
K2O	0.005	0.01	0.013	0.001	0.011	0	0	0.018	0.009	0.008	0.012	0.002	0.016	0.018	0.005	0.002	0.009	0.011	0.021	0.012	0.012	0.016	0.005	0.017	0	0.011	0.011	0.026	0.015	0.009	0.008	0.013	0.004	0.012	0.009	0.003	0.005	0.015	0.001	0.014
FeO	4.864	4.567	4.819	4.888	4.897	4.883	4.907	4.868	5.094	5.116	5.132	5.104	5.112	4.892	4.841	4.414	4.538	4.458	4.372	4.252	4.02	4.194	4.245	4.145	4.213	4.173	4.232	4.26	4.27	4.248	4.26	4.135	4.095	4.14	4.022	4.066	3.952	4.124	4.283	4.34
MnO	0.021	0.009	0.03	0.024	0.036	0.025	0.012	0.029	0.025	0.012	0	0.002	0.008	0.019	0.002	0.016	0.039	0.024	0.004	0.016	0.01	0.008	0.023	0.01	0.023	0.007	0.037	0.003	0.005	0	0.005	0.007	0.013	0.021	0.011	0.015	0.018	0.029	0	0.021
TiO2	0.175	0.22	0.245	0.28	0.296	0.248	0.326	0.309	0.604	0.65	0.646	0.599	0.653	0.667	0.611	0.519	0.451	0.28	0.389	0.367	0.303	0.463	0.454	0.409	0.433	0.412	0.381	0.373	0.422	0.44	0.406	0.389	0.394	0.331	0.336	0.348	0.384	0.402	0.372	0.438
CaO	0.146	0.147	0.168	0.178	0.157	0.163	0.161	0.208	0.375	0.375	0.39	0.37	0.362	0.371	0.377	0.325	0.326	0.249	0.259	0.259	0.218	0.303	0.315	0.328	0.313	0.321	0.318	0.315	0.328	0.315	0.319	0.325	0.313	0.331	0.317	0.322	0.349	0.352	0.345	0.37
Na2O	2.007	1.974	2.018	2.087	2.098	2.079	2.116	2.134	2.207	2.293	2.253	2.283	2.251	2.259	2.285	2.279	2.207	2.214	2.28	2.312	2.228	2.125	2.37	2.22	2.189	2.217	2.225	2.278	2.307	2.244	2.277	2.271	2.234	2.243	2.31	2.346	2.331	2.236	2.371	2.267
Al2O3	33.719	33.789	33.668	33.435	33.321	33.406	33.496	33.451	32.693	32.622	32.607	32.592	32.557	32.668	32.819	32.817	33.299	33.327	33.168	33.115	33.571	33.585	33.513	33.524	33.735	33.509	33.503	33.498	33.327	33.382	33.473	33.094	33.343	33.462	33.341	33.398	33.095	33.241	33.2	32.616
SiO2	37.616	38.083	37.79	37.846	38.084	37.66	37.969	37.655	37.444	37.168	37.219	37.192	37.357	37.312	37.658	37.663	37.536	37.587	37.486	37.734	37.525	37.407	37.541	37.504	37.811	37.662	37.402	37.604	37.565	37.477	37.503	37.618	37.52	37.424	37.519	37.554	37.592	37.687	37.797	37.519
Cl	0	0	0	0.001	0	0	0	0	0	0.01	0	0.001	0.007	0.001	0.003	0.003	0	0.001	0.005	0	0	0	0.003	0.001	0.004	0	0	0	0	0.007	0.002	0	0.004	0	0.001	0.002	0	0.001	0	0
P2O5	0.011	0	0	0	0.006	0	0	0.005	0	0	0	0	0	0	0.007	0	0.01	0.003	0	0	0	0.006	0.006	0.01	0	0.002	0.012	0.002	0	0.006	0.002	0	0	0	0.019	0	0.01	0	0.005	0.002
Total	85.953	86.099	86.108	86.232	86.214	85.814	86.368	86.16	85.946	85.974	86.05	85.805	86.18	86.007	86.257	85.791	86.24	86.005	86.008	86.193	85.711	85.914	86.297	85.875	86.432	86.078	85.803	86.043	86.187	86.041	86.068	85.659	85.869	85.931	85.916	85.881	85.59	86.013	86.398	85.694
B2O3*	10.8474	10.9207	10.8793	10.8857	10.9054	10.8358	10.9117	10.8636	10.8082	10.7819	10.7908	10.7694	10.8101	10.8056	10.8656	10.8434	10.8684	10.8538	10.8463	10.8868	10.8509	10.8548	10.8958	10.8603	10.9362	10.8901	10.8405	10.8781	10.8786	10.8616	10.8699	10.8441	10.8564	10.8536	10.8599	10.8647	10.8429	10.8799	10.9132	10.8126
	XJ-3
Sample No.	1	2	3	4	5	6	7	8	9	10	11	12	13	14	15	16	17	18	19	20	21	22	23	24	25	26	27	28	29	30	31	32	33	34	35	36	37	38	39	40
F	0.078	0.07	0.076	0.043	0.134	0.079	0.048	0.101	0.076	0.066	0.037	0	0.016	0.036	0.077	0.066	0.015	0.024	0	0.071	0.09	0.047	0.018	0.067	0.032	0.074	0.034	0.049	0.057	0	0.062	0	0.044	0.089	0.123	0.057	0.083	0.072	0.036	0.045
MgO	9.507	9.368	9.354	9.406	9.573	9.433	9.316	9.367	9.506	9.66	9.339	9.262	9.276	9.05	9.037	9.18	8.975	9.091	9.006	8.925	9.014	9.315	9.356	9.319	9.374	9.38	9.218	9.155	9.386	9.316	9.412	9.192	9.125	9.257	9.252	9.272	9.354	9.357	9.337	9.259
K2O	0.017	0.012	0.007	0.007	0.019	0.005	0.008	0.007	0.02	0.013	0.01	0.017	0.012	0.007	0.013	0.016	0.009	0.014	0.021	0.009	0.011	0.004	0	0.017	0.01	0.017	0.002	0.006	0.009	0.014	0.007	0.014	0.008	0.03	0	0.012	0.007	0.014	0.026	0.01
FeO	2.654	2.762	2.781	2.718	2.778	2.836	2.786	2.797	2.773	2.921	2.876	2.858	2.753	2.71	2.707	2.737	2.722	2.75	2.73	2.73	2.614	2.807	2.753	2.641	2.77	2.773	2.736	2.726	2.796	2.731	2.751	2.645	2.725	2.678	2.623	2.725	2.523	2.629	2.658	2.664
MnO	0	0	0.022	0	0.024	0.007	0.011	0.012	0	0	0.002	0.004	0	0	0.005	0.019	0	0.025	0.008	0	0	0	0	0.004	0	0	0.013	0.003	0	0.006	0	0	0.002	0	0.001	0.011	0	0	0	0
TiO2	0.257	0.709	0.691	0.736	0.721	0.801	0.707	0.742	0.73	0.762	0.624	0.675	0.626	0.532	0.473	0.602	0.451	0.507	0.465	0.436	0.544	0.709	0.657	0.675	0.676	0.665	0.631	0.642	0.733	0.677	0.682	0.715	0.657	0.64	0.684	0.658	0.675	0.701	0.674	0.646
CaO	1.794	1.875	1.893	1.816	1.773	1.827	1.744	1.805	1.747	1.83	1.614	1.577	1.565	1.259	1.274	1.276	1.181	1.184	1.15	1.147	1.206	1.696	1.553	1.613	1.63	1.615	1.615	1.575	1.695	1.712	1.724	1.696	1.667	1.689	1.687	1.669	1.683	1.795	1.741	1.832
Na2O	1.594	1.515	1.563	1.629	1.604	1.555	1.667	1.603	1.662	1.669	1.692	1.7	1.597	1.62	1.577	1.635	1.608	1.685	1.618	1.616	1.691	1.521	1.598	1.559	1.608	1.606	1.497	1.6	1.591	1.568	1.572	1.508	1.551	1.519	1.556	1.483	1.514	1.5	1.498	1.463
Al2O3	32.898	32.789	32.633	32.589	32.188	32.133	32.353	32.079	32.323	31.907	32.401	32.319	32.593	33.055	33.519	32.923	33.157	33.395	33.066	33.209	33.037	32.451	32.462	32.492	32.432	32.472	32.871	32.517	32.705	32.418	32.412	32.592	32.318	32.468	32.447	32.58	32.409	32.786	32.691	32.752
SiO2	37.292	37.365	37.237	36.974	37.209	37.126	37.102	37.256	37.084	37.018	37.466	37.335	37.058	37.593	37.501	37.545	37.677	37.55	37.587	37.466	37.559	37.043	37.245	37.387	37.535	37.495	37.432	37.486	37.553	37.305	37.278	37.362	37.492	37.47	37.438	37.341	37.144	37.171	37.295	37.188
Cl	0	0	0	0	0	0	0.005	0	0	0.002	0	0	0	0	0.002	0	0.002	0	0	0.001	0.003	0	0.007	0	0.001	0.003	0	0	0	0.004	0	0	0.002	0	0.004	0	0.003	0	0	0
P2O5	0.001	0.007	0	0.007	0	0.004	0.001	0.009	0.012	0	0.001	0.006	0	0.005	0.014	0	0.001	0.005	0	0	0	0.003	0.004	0	0.004	0.005	0	0.001	0	0	0	0.01	0	0	0	0	0.002	0	0.004	0.001
Total	86.059	86.443	86.225	85.907	85.967	85.773	85.727	85.735	85.901	85.82	86.046	85.753	85.489	85.852	86.167	85.971	85.792	86.22	85.651	85.58	85.73	85.576	85.643	85.746	86.059	86.073	86.035	85.739	86.501	85.75	85.874	85.734	85.572	85.803	85.762	85.784	85.361	85.995	85.945	85.841
B2O3*	10.906	10.9509	10.9175	10.8755	10.8714	10.8525	10.8558	10.8552	10.8662	10.837	10.9015	10.868	10.8375	10.9137	10.9456	10.9143	10.9147	10.9498	10.893	10.8805	10.9023	10.8392	10.858	10.8819	10.9132	10.9099	10.9192	10.8865	10.9629	10.8759	10.8807	10.8889	10.8682	10.8896	10.886	10.882	10.8346	10.9033	10.9021	10.8896
note: The calculation method of B2O3*can be found in Henry et al., 1985
[truncated: 16 more columns]

## Sheet: Table S2
Table S2 Trace elements of the GIGT, XJ-1 and XJ-3 touurmalines analyzed by LA-ICP-MS.
	Li	Sc	V	Cr	Co	Zn	Rb	Sr	Y	Zr	Nb	Ba	La	Ce	Pr	Nd	Sm	Eu	Gd	Tb	Dy	Ho	Er	Tm	Yb	Lu	Hf	Ta	Pb	Th	U
GIGT-01	37.28	24.02	169.91	11	5.17	20.39	0.25	33.08	0.088	3.05	0.038	0.44	0.464	1.277	0.123	0.399	0.157	0.04	0.188	0.0112	0.066	0.0047	0	0.0047	0.041	0	0.083	0.018	0.998	0	0
GIGT-02	38.01	22.92	165.61	6.19	4.74	18.83	0.25	32.5	0.075	2.91	0.023	0.46	0.554	1.287	0.124	0.253	0.136	0.096	0.152	0.0162	0.078	0	0.053	0.013	0	0.0104	0	0.023	0.909	0	0
GIGT-03	36.45	23.97	168.88	4.05	4.8	21.51	0.25	32.35	0.078	3.13	0.035	0.44	0.516	1.431	0.175	0.38	0.082	0.074	0.161	0.0183	0.062	0.0196	0.039	0.0196	0.06	0.0123	0.079	0.0169	0.952	0	0.0018
GIGT-04	35.92	21.83	158.2	4.16	4.54	22.17	0.26	26.13	0.074	2.93	0.033	0.49	0.337	0.851	0.094	0.216	0.138	0.058	0.2	0.0192	0.092	0.0093	0.021	0	0.04	0.0105	0.023	0.02	0.779	0.0063	0
GIGT-05	32.85	24.43	168.65	4.52	4.62	19.88	0.27	28.54	0.082	3.27	0.027	0.5	0.566	1.041	0.088	0.462	0.133	0.079	0.17	0.0216	0	0.0267	0	0	0.046	0.0146	0.066	0.0106	0.847	0.0101	0
GIGT-06	32.85	22.51	163.89	8.73	5.08	20.22	0.29	28.27	0.109	3.62	0.046	0.49	0.404	1.154	0.093	0.197	0.189	0.115	0.208	0.0152	0	0.0163	0.077	0.0163	0	0.0027	0.112	0.032	0.731	0	0
GIGT-07	29.12	23.39	167.17	4.68	4.91	17.67	0.29	26.39	0.081	3.27	0.039	0.61	0.43	1.138	0.068	0.362	0.126	0.109	0.19	0.0184	0.05	0.014	0.109	0	0.068	0.0152	0	0.023	0.803	0	0
GIGT-08	35.89	23.23	167.63	4.98	5.12	19.73	0.33	26.19	0.099	3.59	0.042	0.57	0.44	1.022	0.068	0.397	0.141	0.047	0.126	0.016	0.067	0.01	0	0.005	0.017	0.0108	0	0.0129	0.834	0.0091	0
GIGT-09	34.9	22.73	167.15	4.33	4.58	19.09	0.26	25.46	0.088	3.05	0.024	0.49	0.306	0.954	0.093	0.23	0.099	0.068	0.217	0	0	0	0.077	0.0089	0.058	0.0084	0.065	0.0181	0.824	0	0
GIGT-10	32.6	22.68	159.47	6.06	4.09	17.58	0.3	24.81	0.128	3.78	0.05	0.53	0.382	0.32	0.067	0.194	0.18	0.063	0.161	0.0236	0	0.0047	0	0.0179	0.087	0.0113	0.045	0.033	0.765	0.0095	0
GIGT-11	32.27	22.28	167.97	5.05	4.86	16.25	0.29	25.76	0.121	3.38	0.053	0.56	0.341	0.944	0.065	0.4	0.127	0.091	0.14	0.02	0.019	0.0219	0	0.0155	0.016	0.0098	0	0.032	0.527	0	0
GIGT-12	37.28	21.98	164.49	5.78	4.8	17.92	0.33	23.41	0.124	3.74	0.025	0.6	0.483	0.928	0.063	0.173	0.104	0.057	0.164	0.0042	0.07	0.0182	0	0.0045	0	0.0198	0.022	0.024	0.697	0.0024	0
GIGT-13	29.47	24.3	168.48	5.27	4.58	16.79	0.32	21.61	0.081	3.68	0.039	0.58	0.266	0.867	0.06	0.251	0.228	0.054	0.177	0	0	0.0161	0.072	0.0227	0.055	0.0056	0.078	0.024	0.602	0	0
GIGT-14	29.07	21.84	178.82	5.81	4.9	21.65	0.3	24.8	0.094	3.51	0.049	0.49	0.469	0.963	0.107	0.482	0.09	0.055	0.171	0.0042	0	0.0155	0.041	0.0091	0	0.0098	0.044	0.026	0.913	0	0.0111
GIGT-15	33.5	22.52	175.61	5.06	5.03	18.39	0.33	25.22	0.094	3.65	0.05	0.56	0.381	1.036	0.091	0.324	0.243	0.139	0.174	0.01	0.06	0.039	0.044	0.0049	0.055	0	0.08	0.038	0.645	0.0052	0
GIGT-16	30.04	22.73	174	4.87	5.01	20.31	0.3	25.74	0.083	3.33	0.032	0.46	0.417	1.068	0.039	0.27	0.127	0.065	0.166	0.0172	0.051	0.0055	0.084	0.0227	0.09	0.0117	0	0.02	0.54	0	0
GIGT-17	28.31	21.92	164.72	5.68	4.81	18.66	0.29	21.53	0.1	3.39	0.053	0.71	0.217	0.873	0.079	0.26	0.077	0.045	0.148	0.0124	0.115	0.0133	0	0.0188	0.046	0	0.128	0.02	0.868	0.0112	0
GIGT-18	35.42	21.42	169.09	4.03	4.71	19.18	0.27	25.57	0.09	3.25	0.034	0.5	0.427	1.104	0.119	0.185	0.209	0.117	0.187	0.0098	0.066	0	0.054	0.0052	0.018	0.0076	0.025	0.0202	0.767	0	0.0022
GIGT-19	33.42	25.72	187.86	7.1	4.74	17.91	0.28	26.82	0.093	3.29	0.038	0.39	0.445	1.167	0.13	0.29	0.12	0.033	0.132	0	0	0.0121	0.021	0.012	0	0.0076	0.068	0.009	0.848	0	0
GIGT-20	34.83	26.28	185.19	10.82	4.86	20.97	0.29	27.53	0.102	3.17	0.035	0.47	0.403	1.294	0.065	0.43	0.03	0.055	0.158	0.0116	0	0.0051	0.056	0.0215	0.061	0.0136	0.104	0.023	0.861	0	0
XJ-1-01	13.8818	18.3539	234.559	152.263	2.77251	6.94725	0	188.81	0.0410903	1.4111	0	0.212131	5.41296	9.32526	0.86327	2.39403	0.407376	0.772296	0.0201097	0.0193967	0.0741462	0.00643005	0	0.00625175	0	0	0.00729319	0	4.07754	0	0.00261041
XJ-1-02	13.5822	19.1258	244.69	179.31	2.92908	6.89948	0.0611101	183.349	0.0415568	0	0.0205056	0.133609	4.58505	7.92899	0.756704	2.34912	0.361508	0.790905	0	0.0164493	0	0.00465658	0.0426628	0	0.015711	0	0	0	3.95382	0	0.00134427
XJ-1-03	12.3375	20.4984	237.996	258.722	2.84374	7.23107	0.0366683	170.177	0.00904368	0	0.00828819	0.372322	3.87343	6.89396	0.632393	2.12246	0.188087	0.685244	0.0508029	0.0171043	0	0	0.0111504	0.0070012	0	0.0054317	0	0.00595846	3.8091	0.00808973	0
XJ-1-04	14.5426	23.7213	278.735	438.616	3.0764	6.27119	0	161.851	0.0643671	0	0.0194316	0.198206	3.58763	6.40209	0.591783	2.12248	0.319127	0.745227	0.0872569	0.00830407	0.034577	0.00449529	0.0114315	0	0	0	0	0.00628764	3.72727	0	0.00144221
XJ-1-05	13.917	24.127	292.605	596.95	3.04025	7.44	0	149.232	0.0820843	0	0	0.129885	2.99484	5.82237	0.512704	1.94707	0.396886	0.729306	0.330588	0.011608	0.0591805	0.0105365	0	0	0	0	0	0	2.89634	0	0.00455802
XJ-1-06	15.5283	23.4596	279.878	388.933	3.134	4.9826	0	146.686	0.0488904	0	0.00839822	0.232385	2.80807	5.59917	0.533124	2.02281	0.359014	0.751422	0.233157	0.0233578	0.0497173	0	0	0	0	0	0	0	3.28994	0	0
XJ-1-07	19.7988	25.2658	272.228	263.688	2.91614	6.18144	0.103381	145.318	0.0154552	0	0.00851597	0.132958	2.69632	5.12326	0.464523	1.60187	0.265628	0.672347	0.175295	0.0189335	0.0451523	0.000986642	0.0221187	0.00958925	0.0163799	0.00860667	0.00434837	0.00752182	3.29734	0.00835213	0
XJ-1-08	12.5198	18.9669	247.799	99.0143	2.78267	5.67349	0	149.126	0.0707738	0.34448	0.0120344	0	3.0478	5.75526	0.544419	1.49732	0.276506	0.67446	0.170328	0.00658216	0.0266636	0	0	0	0	0.00311225	0.0106468	0	3.13651	0	0
XJ-1-09	20.1281	16.8013	214.541	130.854	3.32924	6.20362	0.0758002	148.482	0.0637575	0	0.00413675	0.329784	2.95447	5.56061	0.558347	1.81552	0.424136	0.621039	0.266842	0.00865677	0.118145	0.00918294	0	0	0	0.00413897	0.029157	0	2.89691	0	0.00711234
XJ-1-10	18.9663	14.0913	205.623	149.939	3.05978	3.53269	0	154.946	0.154873	0.907858	0	0	3.60159	6.57878	0.617087	2.10368	0.129386	0.729278	0.135166	0	0.0712526	0	0	0.00551542	0	0	0.0471561	0	2.51194	0	0
XJ-1-11	23.8563	14.1188	166.874	166.302	2.88833	4.95112	0	100.763	0.103136	0	0	0.0615621	1.97571	3.77912	0.381114	1.41154	0.0989184	0.480635	0	0	0	0	0.0623693	0	0	0	0	0.0170181	1.94106	0.00300686	0
XJ-1-12	21.0948	14.6916	174.338	246.501	2.75805	5.66175	0	104.883	0	0	0.00261595	0	1.8863	3.60913	0.343458	1.24824	0.274797	0.413817	0.111359	0.0169452	0.0304483	0	0.0374979	0.00561101	0	0	0.0615395	0.00323086	1.86385	0.00313822	0
XJ-1-13	26.1145	14.5579	177.877	486.727	3.28221	5.50336	0.000366757	101.02	0.11297	0.612214	0	0.188422	1.86791	3.70283	0.386408	1.48862	0.225723	0.351367	0.0296011	0.00215938	0.016468	0.00507329	0	0.00521378	0.0180835	0	0.0228368	0.0024691	1.71736	0	0.00315167
XJ-1-14	13.7425	20.7268	236.18	824.096	3.14177	4.5457	0.116917	156.82	0.056267	0	0.015622	0.266192	3.38326	5.98264	0.539207	2.1777	0.201848	0.577688	0.127021	0	0.0192065	0	0	0.0023577	0.0548497	0.0067322	0	0	3.15062	0	0.00310683
XJ-1-15	14.0609	24.8244	294.712	856.861	3.14418	4.75562	0.0282752	191.603	0.110336	0	0	0	4.2601	7.4736	0.748924	2.48491	0.359672	0.860703	0	0.0228611	0.091683	0.00508451	0	0.00798638	0.0725657	0.00967638	0	0	3.92741	0.00216563	0
XJ-1-16	13.3738	25.3083	276.185	641.763	2.98442	3.76608	0.0560414	190.899	0.0625884	1.54176	0	0.0516929	4.18326	7.62073	0.6716	2.72	0.40364	0.949423	0.0535663	0	0.017446	0	0	0	0.0664187	0.000802754	0.0202778	0.014286	4.24655	0.000374564	0
XJ-1-17	11.9705	23.8319	259.932	620.919	2.82743	4.78124	0	190.401	0.124247	1.40461	0.0250402	0	4.37357	7.70352	0.699566	2.22058	0.594707	0.867778	0.216489	0.0142529	0.141777	0	0.0192782	0	0	0	0	0	4.36331	0.0114163	0
XJ-1-18	11.9905	22.2617	258.616	506.163	3.04742	4.1578	0	171.19	0.0379125	0	0.0321417	0.0788629	3.51324	6.61806	0.644467	2.00937	0.34838	0.812509	0.281501	0.00342836	0.0293639	0.0019177	0	0	0.0486069	0	0.0614533	0.00913692	4.27681	0.0049515	0
XJ-1-19	13.0798	18.8259	225.659	235.671	2.58064	6.11294	0	191.444	0.0877427	0.313715	0.0113123	0	5.15888	9.59246	0.981634	2.66042	0.345131	0.891407	0.128916	0	0.0123888	0	0	0.0107505	0	0.00649431	0	0	4.62593	0	0.0107526
XJ-1-20	11.3411	16.6984	181.939	135.796	2.94894	7.09583	0	197.781	0.0286258	0	0.052263	0	5.27754	10.3904	0.89113	2.68026	0.76318	0.653318	0.278014	0.0118416	0.0191885	0	0	0	0.0178791	0.0034786	0.0338427	0	5.17431	0.0095774	0
XJ-1-21	12.6875	8.30268	116.638	127.231	2.8281	12.1634	0.174633	193.65	0.479257	0.20663	0.037818	0.114165	4.90439	9.56777	0.986981	3.83591	0.601405	0.737025	0.176643	0.0340964	0.111872	0.00742313	1.09326	0.00511211	0	0	0.00436009	7.619	4.39424	0.102221	0
XJ-3-01	16.8736	7.49524	87.3013	21.6137	10.3052	18.9422	0	64.5864	0.0268816	0	0.0438764	0.190455	0.457701	0.670216	0.0895225	0.366312	0.0911089	0.150769	0	0.00518318	0	0.00292122	0	0	0	0	0.0513904	0.0346724	1.81072	0.00334641	0.00171601
XJ-3-02	21.147	6.67964	81.1956	16.5335	9.37801	20.3798	0.0467099	57.0559	0	0	0.0682344	0.466049	0.407196	0.633275	0.0657125	0.331931	0.00320727	0.204024	0.0846771	0	0.0185395	0.00241674	0	0	0.0546793	0	0.0676306	0.0387666	1.80808	0.00308833	0
XJ-3-03	19.6469	5.79966	79.2193	13.6119	9.82058	17.8385	0	48.1791	0	0.281029	0.0622145	0	0.389765	0.484514	0.0582704	0.175816	0	0.0631959	0.211987	0	0.0616558	0	0	0.00222944	0	0.00335031	0	0.0232626	1.28492	0.00151404	0.003167
XJ-3-04	16.7439	6.02239	84.3154	12.4819	9.34573	17.2496	0	47.825	0.0226879	0.0101777	0.0896432	0.0841552	0.261782	0.405196	0.0218208	0.174731	0.0123619	0.117742	0.102469	0	0.015099	0.00196771	0	0.00509071	0	0	0.0478207	0.0203466	1.65779	0	0.0029012
XJ-3-05	16.6611	6.02634	85.4551	20.1813	9.70986	17.5349	0	42.2395	0	0	0.0411961	0.0401931	0.246198	0.365365	0.0233442	0	0.177757	0.120935	0	0.00337341	0	0.00190218	0.0215893	0.00244844	0	0.00532463	0.018846	0.0185911	1.26967	0	0
XJ-3-06	16.7551	6.72881	103.504	46.4418	9.95981	19.6493	0	59.6831	0.00447465	0	0.0498926	0.0512759	0.328516	0.55865	0.0335626	0.11429	0.107102	0.128434	0.101817	0	0	0	0	0.00102182	0.0331812	0.00916801	0.0172682	0	1.6667	0.0112558	0
XJ-3-07	19.7367	5.91185	89.6367	29.1904	10.6984	18.4815	0	59.7004	0	0	0.0439582	0.32353	0.282752	0.460483	0.0325299	0.224302	0	0.15827	0.0739322	0.0131893	0	0	0	0.013125	0.0172038	0.00270618	0	0.0220329	1.78215	0	0
XJ-3-08	16.7784	5.58507	87.1312	25.4662	9.94788	18.1721	0.193907	45.8542	0.0626653	0	0.0327146	0	0.17646	0.375966	0.0429379	0.244643	0.0708143	0.0687956	0.192237	0	0	0.00514116	0	0	0	0	0	0	1.44949	0	0.00302606
XJ-3-09	23.0836	5.80003	87.7676	22.0222	10.5415	18.1389	0	47.9002	0.0132804	0	0.0367602	0.13634	0.31045	0.411933	0.0453309	0.271112	0	0.161698	0.0805142	0	0.0179011	0.00519705	0.0474694	0.00216193	0.0352753	0	0.00922452	0	1.59815	0	0
XJ-3-10	27.0606	4.71704	75.6983	21.7452	10.5771	18.6416	0	29.1647	0.0139928	0	0.0316449	0.211697	0.0684126	0.186641	0.00516917	0	0.0802876	0.0346054	0.126706	0.00969847	0.071632	0.00819364	0.024889	0.0141133	0.0185138	0.00341025	0.0204193	0.00946704	0.965706	0	0.00160864
XJ-3-11	19.5719	5.80316	92.1204	10.8786	10.513	22.0951	0	47.3743	0.0589368	0	0.0318466	0.0777103	0.265213	0.378058	0.0530118	0.163975	0.00337991	0.101648	0.0303766	0	0	0	0.0258216	0.00292842	0	0.00318423	0	0	1.39571	0.00650913	0
XJ-3-12	18.7337	6.04259	85.5604	15.1577	10.0396	19.3166	0	46.9093	0.0204812	0	0.0305954	0	0.221513	0.437284	0.0391445	0.111742	0.0464051	0.157938	0	0	0.0333383	0.00597547	0	0	0.0388034	0.00359383	0	0.018264	1.50465	0.00349125	0
XJ-3-13	16.7046	5.79241	101.471	20.7332	9.94942	17.123	0.116612	49.9649	0	1.06546	0.0565738	0	0.227042	0.343664	0.036621	0.16584	0.0460611	0.144859	0.0408502	0	0	0	0	0.00549197	0	0	0	0.0111337	1.31505	0	0.00627398
XJ-3-14	20.1134	7.58927	108.818	23.3714	10.0689	18.1739	0	56.5919	0	2.17927	0.0848875	0.629146	0.278999	0.487042	0.0446122	0.20929	0.130797	0.178507	0.0876076	0	0	0.00736027	0	0	0.0358823	0.0165622	0.0187531	0.00186003	1.76553	0.00306733	0
XJ-3-15	20.8051	7.26276	101.954	17.9074	9.6571	19.268	0	53.3341	0.00428894	1.71196	0.291289	0	0.360844	0.539146	0.0385514	0.172638	0.0319756	0.177488	0.0305701	0	0	0	0.0327796	0	0.0175302	0.00973412	0.0367108	0.031022	1.98429	0.26765	0
XJ-3-16	18.8533	7.46668	103.698	32.1029	10.1567	19.5669	0	57.1688	0	0	0.0933841	0.164075	0.342787	0.595656	0.0422765	0.278904	0.182448	0.147453	0	0.0077734	0	0	0	0	0.0175447	0	0.032202	0	1.86827	0	0
XJ-3-17	19.8856	6.20676	97.052	18.2934	9.76852	20.7769	0	52.2369	0.0228411	0	0.0090565	0.247343	0.272025	0.500412	0.018928	0.111764	0.213511	0.164596	0.0185676	0.00138455	0.069986	0.00207874	0.0331901	0.00269975	0	0	0.0348067	0.0171555	1.5793	0	0
XJ-3-18	18.7658	6.80061	95.8921	17.7257	9.6434	17.552	0	53.5004	0.0614874	0.573175	0.0698297	0.485258	0.266391	0.559365	0.0243943	0.18772	0	0.161234	0	0	0	0.0155454	0.0708156	0	0	0.0130632	0	0.0305269	1.79223	0	0
XJ-3-19	18.0944	5.45077	83.5954	18.7317	10.1927	17.5879	0.125014	41.8544	0.0377993	0	0.0459263	0	0.221128	0.390144	0.020328	0.262146	0.0294187	0.122683	0.159707	0.0116989	0.0466356	0	0.0239849	0.00766951	0.0359866	0.00198902	0.0211585	0.0232968	1.47437	0	0
XJ-3-20	17.7847	5.19831	83.2938	23.7657	9.12577	19.551	0	43.0795	0.0656098	0	0.0624156	0	0.245986	0.398548	0.0772802	0.110659	0.0517606	0.0980629	0	0.00459549	0.0320516	0.00861687	0.0392533	0.00298035	0	0	0.0512834	0.0187174	1.20888	0	0
XJ-3-21	16.7729	5.25636	80.5696	19.2413	9.45875	17.0648	0	47.7583	0	1.13287	0.034549	0.0898619	0.307116	0.504797	0.0314649	0.0355669	0.0462716	0.103855	0	0	0	0.00478548	0	0.00552333	0	0.00135122	0.0166204	0.011934	1.68324	0	0
XJ-3-22	16.0676	5.5864	80.2005	27.2962	9.89714	19.9286	0	45.9071	0.0070627	3.36321	0.072508	0.112582	0.221782	0.424432	0.0372979	0.145449	0.0500318	0.0938228	0	0	0.0562456	0	0.0270027	0.00291067	0	0.00372637	0	0	1.4905	0	0
XJ-3-23	17.1325	5.49318	80.2622	26.5647	9.84639	18.5461	0.00978592	48.436	0.0257387	0	0.0254538	0.137092	0.235639	0.497402	0.0295027	0.330304	0.050774	0.0790385	0.0857202	0	0	0	0	0	0	0.0110028	0.0459267	0.00328186	1.47834	0	0
XJ-3-24	20.1725	5.0245	83.2662	42.4008	9.90696	20.1701	0	55.0535	0	1.89646	0.0375084	0.123882	0.366315	0.638765	0.066378	0.219391	0.0463859	0.101506	0	0.0115153	0.0200696	0.00553763	0.00880672	0	0	0	0.0197833	0	1.57955	0	0.00162194
XJ-3-25	16.3565	6.57744	93.8866	49.2318	9.48927	18.4781	0	54.8704	0	0	0.0590956	0.153393	0.331586	0.534138	0.0586798	0.2189	0.0400026	0.204557	0.0802027	0	0.0399239	0.00510434	0	0.00248372	0.0181653	0	0	0.007542	1.87136	0	0.0031471
XJ-3-26	24.4332	6.1276	93.5517	37.796	10.9254	21.0209	0.0787056	72.2483	0	0	0.0396239	0.00839574	0.329574	0.733039	0.0458286	0.123135	0	0.180256	0	0	0	0.00556154	0.0645303	0.00850786	0	0	0	0.00350105	2.37966	0	0
reference material
NIST612-01	39.7134	38.5074	37.1986	35.2812	35.4451	37.1614	29.1841	75.2688	38.5755	35.7084	37.8854	38.2331	37.3846	38.5786	38.7401	37.2006	37.9592	37.0648	38.8642	37.6752	37.3241	38.3988	38.4373	37.8601	39.6375	38.3993	39.7691	37.9952	42.6458	39.5227	37.7445
NIST612-02	40.1501	37.2894	37.6936	34.7998	34.3861	37.143	30.739	76.2446	36.5036	35.3536	37.367	38.4916	34.9576	38.0837	36.2609	34.0994	37.105	33.8997	35.2864	35.8644	34.2201	36.8359	36.9656	35.0504	35.5919	34.6981	35.4143	35.6364	37.7985	36.6303	37.4306
NIST612-03	39.1767	38.6149	38.9491	36.0763	35.9536	39.8513	31.7661	78.9309	37.6714	36.9498	37.9669	39.6883	35.7866	39.3174	37.8519	33.881	36.6272	35.1	37.4822	36.0083	34.8664	36.8599	37.1167	35.4042	37.3906	35.5094	36.1474	36.894	39.3084	36.6601	37.6375
NIST612-04	37.9	36.5597	38.3504	33.9309	34.1422	38.2882	31.1343	77.1785	36.7447	38.5659	37.6236	37.4984	35.1306	37.8906	37.0343	34.2459	36.6588	35.4097	37.1085	36.2411	34.6679	36.3195	36.0368	35.2408	38.2708	34.9151	37.71	35.8671	38.3702	37.0957	37.0517
NIST612-05	38.4413	38.8737	38.9318	34.0181	34.7004	39.7233	31.5372	76.7262	39.6293	38.0688	37.4578	37.6196	38.3955	37.8506	39.5325	35.9853	35.5725	37.4677	38.6956	35.9347	34.8175	39.4614	38.3484	36.9019	37.1187	36.092	38.5847	35.7325	42.7677	37.8801	37.331
NIST612-06	39.5555	38.5167	38.9535	33.5344	33.3507	38.1832	30.7866	75.3571	35.7812	38.1352	36.1788	38.6802	36.1816	38.8128	38.0751	32.47	38.1924	33.3875	36.5927	34.6027	33.1361	36.0269	36.9872	36.193	36.9967	34.6802	33.7711	34.1572	36.9294	37.4987	37.0514
NIST612-07	37.7888	37.6251	38.4741	35.1519	34.1178	40.7404	30.3723	78.7431	37.3078	38.2996	36.5453	38.109	37.6753	38.4177	39.29	33.831	35.2293	35.1146	38.2936	34.966	36.4421	39.4783	39.192	35.3772	38.0741	34.6266	36.4347	38.0336	39.9966	38.4405	38.8566
NIST612-08	39.8274	38.4245	38.0585	32.1695	34.2975	36.3527	29.8	78.5357	37.0115	36.8585	37.1352	38.1936	36.5123	39.2103	37.3611	32.5546	37.328	34.0539	36.1008	35.1617	32.9705	35.895	35.4587	36.9776	36.7974	34.5421	38.7101	33.858	38.5265	38.9779	38.477
NIST612-09	36.8997	40.0446	37.6551	36.2566	33.2421	39.0841	31.1374	76.7545	38.7501	38.6392	38.4852	36.0577	39.0483	36.6614	38.8116	33.4578	33.6796	36.6716	37.4317	35.5516	36.4106	38.666	39.7604	37.2098	36.5469	34.394	37.8452	36.8364	39.5555	37.5151	37.1086
NIST612-10	38.1613	39.8362	38.5844	31.9309	34.6997	37.1265	30.7694	76.2495	37.2823	36.0511	38.0152	38.3644	37.3048	37.1598	38.2333	33.0532	38.0471	34.4081	34.7285	34.8181	33.8211	37.1704	36.0423	36.1281	37.6439	36.0336	37.5281	33.4613	38.1576	37.934	38.495
mean	38.7614	38.4292	38.2849	34.315	34.4335	38.3654	30.7226	76.9989	37.5257	37.263	37.466	38.0936	36.8377	38.1983	38.1191	34.0779	36.6399	35.2578	37.0584	35.6824	34.8677	37.5112	37.4345	36.2343	37.4068	35.389	37.1915	35.8472	39.4056	37.8155	37.7184
2RSD	0.0554411	0.0556098	0.0321749	0.0866074	0.0484919	0.0752984	0.0506191	0.0347645	0.0618401	0.0666273	0.0373924	0.049103	0.0737838	0.0445509	0.0539744	0.0871771	0.0787113	0.0796186	0.0752373	0.0501348	0.0834462	0.0733344	0.0769203	0.0533827	0.0587856	0.0691618	0.0952255	0.0911687	0.0990845	0.0502451	0.0352411

## Sheet: Table S3
Table S3 B isotopic composition of the GIGT, XJ-1 and XJ-3 tourmaline analyzed by LA-MC-ICP-MS.
		11B volt	delta_11B	SE	2SD
	GIGT-line1-01	0.704904	-12.1853	0.0649777	0.246614
	GIGT-line1-02	0.698567	-12.8285	0.0566152	0.244544
	GIGT-line1-03	0.708592	-12.309	0.060954	0.245585
	GIGT-line1-04	0.63575	-12.6414	0.0607977	0.245546
	GIGT-line1-05	0.625834	-12.2008	0.0668173	0.247105
	GIGT-line1-06	0.642413	-12.7276	0.0720633	0.248575
	GIGT-line1-07	0.630514	-12.5148	0.0674569	0.247279
	GIGT-line1-08	0.589777	-12.534	0.0701676	0.248032
	GIGT-line1-09	0.593043	-12.2166	0.0747591	0.24937
	GIGT-line1-10	0.572598	-12.3819	0.0743216	0.249239
	GIGT-line1-11	0.555491	-12.5783	0.0746946	0.249351
	GIGT-line1-12	0.562192	-12.5549	0.0725832	0.248727
	GIGT-line1-13	0.501252	-12.53	0.0745363	0.249303
	GIGT-line1-14	0.51796	-12.8869	0.0759036	0.249716
	GIGT-line1-15	0.845984	-13.0221	0.0574629	0.244742
	GIGT-line1-16	0.863778	-12.7621	0.0499855	0.243095
	GIGT-line1-17	0.838006	-12.3807	0.0543817	0.244037
	GIGT-line1-18	0.842654	-12.6986	0.0584019	0.244964
	GIGT-line1-19	0.790202	-12.8547	0.0539611	0.243943
	GIGT-line1-20	0.816866	-13.1465	0.0614368	0.245705
	GIGT-line1-21	0.801394	-13.2023	0.05935	0.245192
	GIGT-line1-22	0.789801	-12.9248	0.0654677	0.246744
	GIGT-line1-23	0.792369	-12.5619	0.0592413	0.245165
	GIGT-line1-24	0.785118	-12.6622	0.0650993	0.246646
	GIGT-line1-25	0.784507	-12.7055	0.0598425	0.245311
	GIGT-line2-26	0.705506	-12.9179	0.0653309	0.246708
	GIGT-line2-27	0.730724	-13.1425	0.0645008	0.246489
	GIGT-line2-28	0.700284	-12.8608	0.0686875	0.247618
	GIGT-line2-29	0.714734	-12.8763	0.0628447	0.246061
	GIGT-line2-30	0.700402	-12.9862	0.0664558	0.247008
	GIGT-line2-31	0.688092	-12.5816	0.0637745	0.2463
	GIGT-line2-32	0.659028	-12.3496	0.0670081	0.247157
	GIGT-line2-33	0.678668	-12.7346	0.0713906	0.248381
	GIGT-line2-34	0.659946	-12.738	0.0729158	0.248824
	GIGT-line2-35	0.67539	-12.4914	0.0614763	0.245715
	GIGT-line2-36	0.670989	-11.9224	0.0600149	0.245354
	GIGT-line2-37	0.677104	-12.9597	0.0657356	0.246815
	GIGT-line3-38	0.753675	-12.3707	0.0591806	0.430595
	GIGT-line3-39	0.760536	-12.1561	0.0607798	0.430817
	GIGT-line3-40	0.743743	-12.5144	0.0642187	0.431316
	GIGT-line3-41	0.712958	-12.6273	0.0560121	0.430171
	GIGT-line3-42	0.720133	-12.6025	0.0706305	0.432317
	GIGT-line3-43	0.727016	-12.9361	0.0589607	0.430564
	GIGT-line3-44	0.748015	-12.7499	0.0657461	0.431546
	GIGT-line3-45	0.571837	-12.6236	0.0604264	0.430768
	GIGT-line3-46	0.728187	-12.6232	0.0591767	0.430594
	GIGT-line3-47	0.719132	-12.753	0.0627936	0.431106
	GIGT-line3-48	0.71728	-12.5755	0.0616059	0.430935
	GIGT-line3-49	0.707016	-12.7439	0.0610312	0.430853
	GIGT-line3-50	0.705986	-12.5068	0.0615509	0.430927
	GIGT-line3-51	0.692936	-12.4216	0.0597796	0.430677
	GIGT-line3-52	0.705463	-12.6017	0.0626792	0.431089
	GIGT-line3-53	0.699266	-12.7169	0.0597989	0.43068
	GIGT-line3-54	0.705825	-12.5798	0.0594597	0.430633
	GIGT-line3-55	0.709843	-12.7625	0.064998	0.431433
	GIGT-line3-56	0.710337	-12.5212	0.063046	0.431143
	GIGT-line3-57	0.705131	-12.5542	0.0623742	0.431045
	GIGT-line3-58	0.70409	-12.8573	0.0653073	0.431479
	GIGT-line4-59	0.758979	-12.7497	0.0725566	0.409703
	GIGT-line4-60	0.761741	-12.2465	0.0605721	0.407752
	GIGT-line4-61	0.740608	-12.6874	0.0684208	0.408991
	GIGT-line4-62	0.709608	-12.5993	0.0659801	0.40859
	GIGT-line4-63	0.722735	-12.4345	0.0591553	0.407543
	GIGT-line4-64	0.717717	-12.4174	0.0628896	0.408102
	GIGT-line4-65	0.723403	-12.359	0.0615112	0.407892
	GIGT-line4-66	0.705145	-12.7406	0.0676263	0.408859
	GIGT-line4-67	0.723179	-12.8961	0.0584713	0.407445
	GIGT-line4-68	0.724377	-12.5598	0.0642561	0.408315
	GIGT-line4-69	0.725699	-12.7251	0.0573015	0.407279
	GIGT-line4-70	0.706455	-12.0388	0.0636721	0.408224
	GIGT-line4-71	0.737615	-12.461	0.0604833	0.407738
	GIGT-line4-72	0.727047	-12.879	0.0638943	0.408258
	GIGT-line4-73	0.707657	-12.8286	0.0636222	0.408216
	GIGT-line4-74	0.715553	-12.5106	0.0608325	0.40779
	XJ-1-Line1-01	0.831255	-12.7516	0.0550897	0.366933
	XJ-1-Line1-02	0.812227	-12.6885	0.0532556	0.365848
	XJ-1-Line1-03	0.803482	-11.6592	0.0586463	0.369131
	XJ-1-Line1-04	0.78903	-12.0046	0.0630224	0.372004
	XJ-1-Line1-05	0.786757	-11.5715	0.0604436	0.370289
	XJ-1-Line1-06	0.754364	-11.404	0.0622033	0.371453
	XJ-1-Line1-07	0.729294	-11.7233	0.0594263	0.369629
	XJ-1-Line1-08	0.704038	-11.9284	0.0598213	0.369884
	XJ-1-Line1-09	0.71971	-12.0079	0.0643766	0.372931
	XJ-1-Line1-10	0.749355	-11.7055	0.0702392	0.37714
	XJ-1-Line1-11	0.720124	-12.1026	0.0645063	0.37302
	XJ-1-Line1-12	0.719362	-11.8851	0.0636702	0.372445
	XJ-1-Line1-13	0.685339	-12.1598	0.0566928	0.367908
	XJ-1-Line1-14	0.694764	-11.9715	0.0692146	0.376381
	XJ-1-Line1-15	0.697165	-11.9749	0.0648266	0.373242
	XJ-1-Line1-16	0.706817	-12.0543	0.0660242	0.374081
	XJ-1-Line1-17	0.700465	-11.8494	0.0571584	0.368196
	XJ-1-Line1-18	0.700106	-11.7715	0.0622072	0.371455
	XJ-1-Line1-19	0.661274	-11.3723	0.0660596	0.374106
	XJ-1-Line1-20	0.66903	-11.6342	0.0739797	0.379989
	XJ-1-Line1-21	0.660667	-11.7002	0.0642783	0.372863
	XJ-1-Line1-22	0.657351	-12.1807	0.0623413	0.371545
	XJ-1-Line1-23	0.611092	-11.8746	0.0597093	0.369812
	XJ-1-Line1-24	0.622747	-12.4805	0.0614698	0.370964
	XJ-1-Line1-25	0.632652	-12.6528	0.0681877	0.37563
	XJ-1-Line1-26	0.69677	-12.3919	0.0630948	0.372054
	XJ-1-Line1-27	0.686273	-11.5076	0.0638678	0.372581
	XJ-1-Line1-28	0.708449	-12.0521	0.0549476	0.366847
	XJ-1-Line1-29	0.700931	-12.0775	0.0651919	0.373497
	XJ-1-Line1-30	0.684342	-12.1926	0.0640489	0.372705
	XJ-1-Line1-31	0.692958	-12.1669	0.0630868	0.372048
	XJ-1-Line1-32	0.680219	-11.8242	0.0668597	0.374674
	XJ-1-Line1-33	0.672602	-12.1216	0.06909	0.376289
	XJ-1-Line1-34	0.670814	-12.1919	0.0680712	0.375546
	XJ-1-Line1-35	0.658484	-12.451	0.0607952	0.370519
	XJ-1-Line1-36	0.661962	-12.3122	0.0640344	0.372695
	XJ-1-Line1-37	0.649978	-11.641	0.0641019	0.372741
	XJ-1-Line1-38	0.647895	-12.5237	0.0668745	0.374685
	XJ-1-Line2-39	0.641829	-12.1457	0.0670772	0.37483
	XJ-1-Line2-40	0.641705	-12.2493	0.0676683	0.375255
	XJ-1-Line2-41	0.647809	-12.075	0.0712236	0.377877
	XJ-1-Line2-42	0.646413	-11.7486	0.0723201	0.378709
	XJ-1-Line2-43	0.632693	-11.9293	0.0672884	0.374981
	XJ-1-Line2-44	0.632318	-11.5676	0.0687416	0.376034
	XJ-1-Line2-45	0.634647	-11.7159	0.0777328	0.382975
	XJ-1-Line2-46	0.633182	-11.5082	0.0736234	0.379713
	XJ-1-Line2-47	0.636692	-11.4879	0.0715158	0.378098
	XJ-1-Line2-48	0.62206	-11.873	0.0705861	0.377398
	XJ-1-Line2-49	0.627788	-11.973	0.0667176	0.374573
	XJ-1-Line2-50	0.630102	-11.453	0.0716723	0.378216
	XJ-1-Line2-51	0.632355	-11.5466	0.0749231	0.380728
	XJ-1-Line2-52	0.621765	-11.4236	0.0673778	0.375045
	XJ-1-Line2-53	0.632978	-11.5186	0.0736378	0.379724
	XJ-1-Line2-54	0.627598	-11.5617	0.0700061	0.376966
	XJ-1-Line2-55	0.615226	-11.7125	0.0665524	0.374455
	XJ-1-Line2-56	0.613378	-11.7399	0.0738232	0.379868
	XJ-1-Line2-57	0.601772	-11.5708	0.0732337	0.379411
	XJ-1-Line2-58	0.612562	-12.1435	0.0761832	0.381727
	XJ-1-Line2-59	0.612645	-11.8229	0.0725956	0.37892
	XJ-1-Line2-60	0.604615	-11.5947	0.074638	0.380504
	XJ-1-Line2-61	0.597733	-11.9365	0.0724125	0.37878
	XJ-1-Line2-62	0.5849	-11.7749	0.0707354	0.37751
	XJ-1-Line2-63	0.583357	-12.0938	0.0695753	0.376647
	XJ-1-Line2-64	0.572257	-12.0232	0.0757966	0.381419
	XJ-1-Line2-65	0.590439	-12.4217	0.0728273	0.379098
	XJ-1-Line2-66	0.582425	-11.9219	0.0734932	0.379612
	XJ-1-Line2-67	0.576076	-11.8394	0.0732964	0.379459
	XJ-1-Line2-68	0.590138	-12.1053	0.0784622	0.383569
	XJ-1-Line2-69	0.576355	-11.7702	0.073942	0.37996
	XJ-1-Line2-70	0.594103	-11.8451	0.0799839	0.384824
	XJ-1-Line2-71	0.626837	-11.8207	0.0863378	0.390278
	XJ-1-Line2-72	0.577035	-11.4471	0.0704123	0.377269
	XJ-1-Line2-73	0.590638	-11.9341	0.0695552	0.376632
	XJ-1-Line2-74	0.584587	-11.4705	0.0680993	0.375566
	XJ-1-Line2-75	0.583246	-11.5865	0.071521	0.378102
	XJ-1-Line2-76	0.58391	-11.5389	0.0689524	0.376188
	XJ-1-Line2-77	0.587508	-11.9287	0.084872	0.38899
	XJ-1-Line2-78	0.584295	-11.946	0.0763527	0.381862
	XJ-3-Line1-01	0.619727	-12.1169	0.0640099	0.372678
	XJ-3-Line1-02	0.607949	-12.1576	0.0690474	0.376258
	XJ-3-Line1-03	0.583333	-11.4218	0.0682409	0.375669
	XJ-3-Line1-04	0.628257	-11.9154	0.0721244	0.37856
	XJ-3-Line1-05	0.622802	-12.5843	0.0685041	0.375861
	XJ-3-Line1-06	0.617997	-12.046	0.0696527	0.376704
	XJ-3-Line1-07	0.60451	-12.0056	0.0667738	0.374613
	XJ-3-Line1-08	0.580926	-11.6705	0.0729708	0.379208
	XJ-3-Line1-09	0.588055	-12.0334	0.0688816	0.376137
	XJ-3-Line1-10	0.582853	-11.9443	0.0720338	0.378491
	XJ-3-Line1-11	0.566861	-11.9145	0.0604072	0.370265
	XJ-3-Line1-12	0.573753	-11.7386	0.0778462	0.383067
	XJ-3-Line1-13	0.547557	-11.8535	0.0790724	0.38407
	XJ-3-Line1-14	0.538078	-12.3208	0.0813885	0.386
	XJ-3-Line1-15	0.549521	-11.8374	0.0766489	0.3821
	XJ-3-Line1-16	0.518703	-12.0021	0.0642536	0.375662
	XJ-3-Line1-17	0.550053	-11.9789	0.0708595	0.377603
	XJ-3-Line1-18	0.553231	-11.8546	0.0903048	0.393853
	XJ-3-Line1-19	0.546514	-11.9971	0.0673152	0.375
	XJ-3-Line1-20	0.552428	-12.2622	0.0796001	0.384506
	XJ-3-Line1-21	0.567906	-12.082	0.0791673	0.384148
	XJ-3-Line1-22	0.573283	-12.0571	0.0727002	0.379
	XJ-3-Line1-23	0.568635	-12.0087	0.0670922	0.374841
	XJ-3-Line1-24	0.60344	-12.2657	0.0733746	0.37952
	XJ-3-Line1-25	0.580292	-11.421	0.0724501	0.378809
	XJ-3-Line1-26	0.618809	-11.9316	0.0639131	0.372612
	XJ-3-Line1-27	0.602862	-11.7354	0.0746361	0.380503
	XJ-3-Line1-28	0.598417	-12.1848	0.0724436	0.378804
	XJ-3-Line1-29	0.603776	-11.4227	0.0805585	0.385303
	XJ-3-Line1-30	0.603261	-11.6498	0.0706278	0.37743
	XJ-3-Line1-31	0.605004	-12.1345	0.0681448	0.375599
	XJ-3-Line1-32	0.596078	-11.3889	0.0675542	0.375172
	XJ-3-Line1-33	0.608685	-11.6821	0.0729271	0.379175
	XJ-3-Line1-34	0.601172	-12.0456	0.0661629	0.374179
	XJ-3-Line1-35	0.59071	-12.0101	0.0724029	0.378773
	XJ-3-Line1-36	0.597729	-11.971	0.0794772	0.384404
	XJ-3-Line1-37	0.566878	-11.6466	0.065746	0.373885
	XJ-3-Line1-38	0.575485	-12.3682	0.0693095	0.376451
	XJ-3-Line2-39	0.577407	-11.4002	0.0740124	0.380015
	XJ-3-Line2-40	0.592836	-11.4262	0.0807718	0.385482
	XJ-3-Line2-41	0.577038	-11.9726	0.080436	0.385201
	XJ-3-Line2-42	0.581731	-11.9602	0.0727417	0.379032
	XJ-3-Line2-43	0.572117	-12.0261	0.0785313	0.383626
	XJ-3-Line2-44	0.575623	-11.7084	0.0787289	0.383788
	XJ-3-Line2-45	0.58114	-11.5732	0.0710151	0.37772
	XJ-3-Line2-46	0.568669	-11.6355	0.0704578	0.377303
	XJ-3-Line2-47	0.578556	-11.8462	0.0746173	0.380488
	XJ-3-Line2-48	0.565901	-11.4105	0.074069	0.380059
	XJ-3-Line2-49	0.58296	-11.4006	0.0856241	0.389649
	XJ-3-Line2-50	0.58252	-11.249	0.0832534	0.387588
	XJ-3-Line2-51	0.571139	-11.6729	0.0765505	0.382021
	XJ-3-Line2-52	0.566124	-11.4724	0.0753717	0.381082
	XJ-3-Line2-53	0.576736	-12.095	0.0746787	0.380536
	XJ-3-Line2-54	0.573823	-12.0901	0.0696707	0.376717
	XJ-3-Line2-55	0.580498	-12.2706	0.0725291	0.378869
	XJ-3-Line2-56	0.589343	-12.2028	0.0845863	0.388741
	XJ-3-Line2-57	0.584461	-11.4362	0.0779204	0.383127
	XJ-3-Line2-58	0.581593	-11.8774	0.0787472	0.383803
	XJ-3-Line2-59	0.568361	-11.9701	0.069321	0.376459
	XJ-3-Line2-60	0.583474	-12.4599	0.0861965	0.390153
	XJ-3-Line2-61	0.57068	-12.5511	0.0756974	0.38134
	XJ-3-Line2-62	0.577531	-12.1793	0.0760007	0.381581
	XJ-3-Line2-63	0.566281	-11.942	0.0754475	0.381142
	XJ-3-Line2-64	0.569051	-11.7406	0.0748379	0.380661
	XJ-3-Line2-65	0.55149	-11.994	0.0746568	0.380519
	XJ-3-Line2-66	0.549084	-12.0378	0.0837127	0.387984
	XJ-3-Line2-67	0.562121	-11.4942	0.0737563	0.379816
	XJ-3-Line2-68	0.555912	-12.2874	0.0728573	0.379121
	XJ-3-Line2-69	0.559837	-12.0283	0.0754781	0.381166
	XJ-3-Line2-70	0.551237	-12.1918	0.0840267	0.388255
	XJ-3-Line2-71	0.567186	-12.1858	0.0756544	0.381306
	XJ-3-Line2-72	0.553724	-12.199	0.0771335	0.38249
	XJ-3-Line2-73	0.566829	-12.5795	0.073483	0.379604
	XJ-3-Line2-74	0.574101	-11.4024	0.0788089	0.383853
standard	RB2-01	0.723533	-13.1615	0.080436
	RB2-02	0.723609	-12.8237	0.0787289
	RB2-03	0.648347	-13.3104	0.0696707
	RB2-04	0.551022	-13.6885	0.0754475
	RB2-05	0.509832	-13.1271	0.0791673
	RB2-06	0.488414	-13.1867	0.0746361
	RB2-07	0.484115	-13.0408	0.0729271
	RB2-08	0.833546	-13.0294	0.0525335
	RB2-09	0.834251	-13.1725	0.0612095
	RB2-10	0.754464	-13.266	0.0576787
	RB2-11	0.768279	-13.2579	0.0611878
	RB2-12	0.797084	-13.2991	0.0583939
	RB2-13	0.774919	-13.1407	0.0558329
	RB2-14	0.641864	-13.1791	0.0678293
	RB2-15	0.659477	-13.0012	0.0718112
	RB2-16	0.621778	-12.9835	0.0782364

## Sheet: PlotDat1
Source sheet	Table S4	0.3	0.708263	1	0.708031	0.000162431
Plot name	Average1	176.7	0.708263	2	0.708397	0.000168423
Plot Type	15			3	0.708245	0.000181257
1st free col	8			4	0.708463	0.000173534
Sigma Level	2			5	0.708403	0.00018595
Absolute Errs	TRUE			6	0.708308	0.000186172
Symbol Type	1			7	0.708413	0.000212387
Inverse Plot	FALSE			8	0.708203	0.000179409
Color Plot	TRUE			9	0.708068	0.000151252
3D plot	FALSE			10	0.708245	0.00019322
Linear	FALSE			11	0.708268	0.000263442
Data Range	G3:H99,G119:H201			12	0.708073	0.000185518
Filled Symbols	FALSE			13	0.708479	0.000202956
ConcAge	FALSE			14	0.708385	0.000301838
ConcSwap	FALSE			15	0.70836	0.000287319
1st Symbol-row	1			16	0.708169	0.00028184
				17	0.708292	0.000299409
				18	0.708158	0.000249557
				19	0.708385	0.000184252
				20	0.708378	0.000175095
				21	0.708379	0.000200393
				22	0.708375	0.00016768
				23	0.708302	0.000165719
				24	0.708185	0.000146653
				25	0.708113	0.000161538
				26	0.708251	0.000180987
				27	0.708388	0.000204822
				28	0.708417	0.000216147
				29	0.708186	0.000188988
				30	0.708328	0.000224009
				31	0.708392	0.00020692
				32	0.708158	0.000209872
				33	0.708232	0.000226003
				34	0.708177	0.000212083
				35	0.70816	0.00019288
				36	0.708192	0.000212126
				37	0.708092	0.000200945
				38	0.708316	0.00021536
				39	0.708211	0.000211358
				40	0.708225	0.000206507
				41	0.708475	0.000247127
				42	0.708552	0.000221815
				43	0.708492	0.000219472
				44	0.708273	0.000186105
				45	0.708394	0.000188974
				46	0.708103	0.000196353
				47	0.708072	0.000180558
				48	0.708266	0.000213274
				49	0.708135	0.000183843
				50	0.708231	0.000217376
				51	0.70804	0.000213676
				52	0.708251	0.000215772
				53	0.708224	0.000230916
				54	0.708401	0.000315763
				55	0.708371	0.000331113
				56	0.708391	0.000210221
				57	0.708298	0.000275452
				58	0.708178	0.000312287
				59	0.708391	0.000311859
				60	0.708154	0.000358018
				61	0.708241	0.000325792
				62	0.708178	0.000266611
				63	0.708242	0.000212784
				64	0.708279	0.000199187
				65	0.708409	0.000211759
				66	0.708355	0.000200576
				67	0.708251	0.000198949
				68	0.708237	0.000200389
				69	0.708204	0.000198256
				70	0.70829	0.000218799
				71	0.708147	0.000248311
				72	0.708353	0.000182105
				73	0.708273	0.000187857
				74	0.70816	0.000204304
				75	0.708242	0.00018464
				76	0.708098	0.000173199
				77	0.708127	0.000167937
				78	0.708398	0.000170794
				79	0.708376	0.000170888
				80	0.708202	0.000167828
				81	0.708225	0.000187986
				82	0.708421	0.000166157
				83	0.708375	0.000158387
				84	0.708122	0.000160216
				85	0.708156	0.000172127
				86	0.70807	0.000182766
				87	0.708274	0.000181175
				88	0.708295	0.000187484
				89	0.708398	0.000187213
				90	0.708286	0.000203761
				91	0.708272	0.000184183
				92	0.708479	0.000211911
				93	0.708353	0.000183302
				94	0.70828	0.000168343
				95	0.708156	0.000170586
				96	0.708374	0.000159852
				97	0.708217	0.000156913
				98	0.708196	0.000151951
				99	0.708226	0.000157497
				100	0.708074	0.000140442
				101	0.708324	0.000187215
				102	0.708131	0.000170771
				103	0.708251	0.000161281
				104	0.708026	0.000172922
				105	0.708234	0.000168413
				106	0.708293	0.000185142
				107	0.708321	0.000186012
				108	0.708393	0.000192216
				109	0.708253	0.000186136
				110	0.708169	0.000155476
				111	0.708313	0.000134638
				112	0.708237	0.000164798
				113	0.70838	0.000179892
				114	0.708363	0.000144862
				115	0.708357	0.000139435
				116	0.708375	0.000138872
				117	0.708341	0.000203093
				118	0.708141	0.000237188
				119	0.708282	0.000166534
				120	0.708246	0.00019796
				121	0.708372	0.000146664
				122	0.708348	0.000164547
				123	0.708398	0.00013154
				124	0.708313	0.000136046
				125	0.70821	0.000148083
				126	0.708271	0.000135337
				127	0.708155	0.00013221
				128	0.708275	0.000129739
				129	0.70812	0.000138693
				130	0.708323	0.000136207
				131	0.708107	0.000154216
				132	0.708316	0.000136818
				133	0.708148	0.000112756
				134	0.708075	0.000118334
				135	0.708105	0.000122378
				136	0.70815	0.00011119
				137	0.708362	0.000107842
				138	0.708126	0.000112374
				139	0.70833	0.000127799
				140	0.708265	0.000131917
				141	0.708397	0.00012586
				142	0.708374	0.000136251
				143	0.708186	0.000147584
				144	0.708342	0.000132874
				145	0.708418	0.000141331
				146	0.708296	0.00013554
				147	0.708287	0.00015202
				148	0.708353	0.000186142
				149	0.708159	0.000178064
				150	0.708307	0.000186786
				151	0.708268	0.000184078
				152	0.708267	0.000176109
				153	0.708296	0.000186154
				154	0.708382	0.000181919
				155	0.708249	0.000183283
				156	0.708107	0.000179872
				157	0.708223	0.000179054
				158	0.708247	0.000167874
				159	0.708263	0.000189395
				160	0.708137	0.000195262
				161	0.708289	0.000182257
				162	0.70825	0.000175276
				163	0.708363	0.000196424
				164	0.708304	0.000247955
				165	0.708371	0.000197735
				166	0.708267	0.000219167
				167	0.708272	0.000206085
				168	0.708337	0.00021623
				169	0.708163	0.000252341
				170	0.70831	0.000231144
				171	0.708239	0.00021178
				172	0.708279	0.000171788
				173	0.708245	0.000181743
				174	0.708351	0.000164587
				175	0.708205	0.000148379
				176	0.708384	0.000153952
				IsoLine	IsoLine	IsoLine	IsoLine

## Sheet: PlotDat2
Source sheet	Table S4	0.7076	0.14216	0.708022	0	0.7076	0
Plot name	ProbDens2	0.707601	0.144031	0.708055	0	0.708899	0
Plot Type	16	0.707601	0.145926	0.708055	3
1st free col	9	0.707602	0.147846	0.708022	3
Sigma Level	2	0.707603	0.149792	0.708022	0
Absolute Errs	TRUE	0.707603	0.151763	ErrBox	ErrBox
Symbol Type	1	0.707604	0.15376	0.708055	0
Inverse Plot	FALSE	0.707605	0.155782	0.708087	0
Color Plot	TRUE	0.707605	0.157832	0.708087	6
3D plot	FALSE	0.707606	0.159908	0.708055	6
Linear	FALSE	0.707607	0.162012	0.708055	0
Data Range	G3:H99,G119:H201	0.707607	0.164143	ErrBox	ErrBox
Filled Symbols	TRUE	0.707608	0.166302	0.708087	0
ConcAge	FALSE	0.707608	0.16849	0.70812	0
ConcSwap	FALSE	0.707609	0.170706	0.70812	8
1st Symbol-row	1	0.70761	0.172952	0.708087	8
		0.70761	0.175227	0.708087	0
		0.707611	0.177532	ErrBox	ErrBox
		0.707612	0.179867	0.70812	0
		0.707612	0.182233	0.708152	0
		0.707613	0.18463	0.708152	10
		0.707614	0.187059	0.70812	10
		0.707614	0.18952	0.70812	0
		0.707615	0.192014	ErrBox	ErrBox
		0.707616	0.19454	0.708152	0
		0.707616	0.1971	0.708185	0
		0.707617	0.199694	0.708185	15
		0.707618	0.202322	0.708152	15
		0.707618	0.204984	0.708152	0
		0.707619	0.207682	ErrBox	ErrBox
		0.707619	0.210416	0.708185	0
		0.70762	0.213186	0.708217	0
		0.707621	0.215993	0.708217	12
		0.707621	0.218837	0.708185	12
		0.707622	0.221719	0.708185	0
		0.707623	0.22464	ErrBox	ErrBox
		0.707623	0.227599	0.708217	0
		0.707624	0.230597	0.70825	0
		0.707625	0.233636	0.70825	21
		0.707625	0.236715	0.708217	21
		0.707626	0.239835	0.708217	0
		0.707627	0.242996	ErrBox	ErrBox
		0.707627	0.2462	0.70825	0
		0.707628	0.249447	0.708283	0
		0.707629	0.252737	0.708283	23
		0.707629	0.256071	0.70825	23
		0.70763	0.25945	0.70825	0
		0.707631	0.262874	ErrBox	ErrBox
		0.707631	0.266344	0.708283	0
		0.707632	0.26986	0.708315	0
		0.707632	0.273424	0.708315	17
		0.707633	0.277036	0.708283	17
		0.707634	0.280696	0.708283	0
		0.707634	0.284406	ErrBox	ErrBox
		0.707635	0.288165	0.708315	0
		0.707636	0.291975	0.708348	0
		0.707636	0.295837	0.708348	10
		0.707637	0.29975	0.708315	10
		0.707638	0.303717	0.708315	0
		0.707638	0.307737	ErrBox	ErrBox
		0.707639	0.311811	0.708348	0
		0.70764	0.315941	0.70838	0
		0.70764	0.320126	0.70838	22
		0.707641	0.324369	0.708348	22
		0.707642	0.328669	0.708348	0
		0.707642	0.333027	ErrBox	ErrBox
		0.707643	0.337445	0.70838	0
		0.707644	0.341922	0.708413	0
		0.707644	0.346461	0.708413	19
		0.707645	0.351061	0.70838	19
		0.707646	0.355725	0.70838	0
		0.707646	0.360451	ErrBox	ErrBox
		0.707647	0.365243	0.708413	0
		0.707647	0.3701	0.708445	0
		0.707648	0.375023	0.708445	4
		0.707649	0.380014	0.708413	4
		0.707649	0.385073	0.708413	0
		0.70765	0.390202	ErrBox	ErrBox
		0.707651	0.395401	0.708445	0
		0.707651	0.400671	0.708477	0
		0.707652	0.406014	0.708477	2
		0.707653	0.41143	0.708445	2
		0.707653	0.416921	0.708445	0
		0.707654	0.422488	ErrBox	ErrBox
		0.707655	0.428132	0.708477	0
		0.707655	0.433853	0.70851	0
		0.707656	0.439654	0.70851	3
		0.707657	0.445535	0.708477	3
		0.707657	0.451497	0.708477	0
		0.707658	0.457542	ErrBox	ErrBox
		0.707658	0.463671	0.708542	0
		0.707659	0.469885	0.708575	0
		0.70766	0.476185	0.708575	1
		0.70766	0.482573	0.708542	1
		0.707661	0.48905	0.708542	0
		0.707662	0.495617	ErrBox	ErrBox
		0.707662	0.502276
		0.707663	0.509028
		0.707664	0.515874
		0.707664	0.522816
		0.707665	0.529855
		0.707666	0.536993
		0.707666	0.544231
		0.707667	0.55157
		0.707668	0.559013
		0.707668	0.56656
		0.707669	0.574214
		0.70767	0.581976
		0.70767	0.589847
		0.707671	0.597829
		0.707672	0.605924
		0.707672	0.614133
		0.707673	0.622459
		0.707673	0.630903
		0.707674	0.639466
		0.707675	0.648151
		0.707675	0.65696
		0.707676	0.665893
		0.707677	0.674955
		0.707677	0.684145
		0.707678	0.693466
		0.707679	0.702921
		0.707679	0.71251
		0.70768	0.722237
		0.707681	0.732103
		0.707681	0.742111
		0.707682	0.752262
		0.707683	0.762559
		0.707683	0.773004
		0.707684	0.783599
		0.707685	0.794347
		0.707685	0.805249
		0.707686	0.816309
		0.707686	0.827529
		0.707687	0.838911
		0.707688	0.850458
		0.707688	0.862172
		0.707689	0.874055
		0.70769	0.886112
		0.70769	0.898343
		0.707691	0.910752
		0.707692	0.923341
		0.707692	0.936114
		0.707693	0.949073
		0.707694	0.962221
		0.707694	0.975561
		0.707695	0.989096
		0.707696	1.00283
		0.707696	1.01676
		0.707697	1.0309
		0.707697	1.04525
		0.707698	1.0598
		0.707699	1.07457
		0.707699	1.08956
		0.7077	1.10477
		0.707701	1.1202
		0.707701	1.13586
		0.707702	1.15175
		0.707703	1.16787
		0.707703	1.18424
		0.707704	1.20084
		0.707705	1.21769
		0.707705	1.23479
		0.707706	1.25215
		0.707707	1.26976
		0.707707	1.28763
		0.707708	1.30577
		0.707709	1.32418
		0.707709	1.34287
		0.70771	1.36183
		0.707711	1.38107
		0.707711	1.4006
		0.707712	1.42043
		0.707712	1.44055
		0.707713	1.46097
		0.707714	1.48169
		0.707714	1.50273
		0.707715	1.52408
		0.707716	1.54575
		0.707716	1.56775
		0.707717	1.59007
		0.707718	1.61274
		0.707718	1.63574
		0.707719	1.65909
		0.70772	1.68279
		0.70772	1.70685
		0.707721	1.73127
		0.707722	1.75606
		0.707722	1.78123
		0.707723	1.80677
		0.707723	1.8327
		0.707724	1.85902
		0.707725	1.88574
		0.707725	1.91287
		0.707726	1.94041
		0.707727	1.96836
		0.707727	1.99674
		0.707728	2.02555
		0.707729	2.0548
		0.707729	2.08449
		0.70773	2.11463
		0.707731	2.14523
		0.707731	2.1763
		0.707732	2.20783
		0.707733	2.23985
		0.707733	2.27236
		0.707734	2.30537
		0.707735	2.33887
		0.707735	2.37289
		0.707736	2.40743
		0.707736	2.44249
		0.707737	2.47809
		0.707738	2.51423
		0.707738	2.55093
		0.707739	2.58819
		0.70774	2.62602
		0.70774	2.66442
		0.707741	2.70342
		0.707742	2.74301
		0.707742	2.78321
		0.707743	2.82402
		0.707744	2.86546
		0.707744	2.90753
		0.707745	2.95025
		0.707746	2.99363
		0.707746	3.03767
		0.707747	3.08239
		0.707748	3.12779
		0.707748	3.17389
		0.707749	3.2207
		0.70775	3.26822
		0.70775	3.31648
		0.707751	3.36548
		0.707751	3.41523
		0.707752	3.46574
		0.707753	3.51703
		0.707753	3.56911
		0.707754	3.62199
		0.707755	3.67568
		0.707755	3.7302
		0.707756	3.78555
		0.707757	3.84176
		0.707757	3.89883
		0.707758	3.95678
		0.707759	4.01562
		0.707759	4.07536
		0.70776	4.13602
		0.707761	4.19761
		0.707761	4.26015
		0.707762	4.32365
		0.707762	4.38813
		0.707763	4.45359
		0.707764	4.52007
		0.707764	4.58756
		0.707765	4.65609
		0.707766	4.72567
		0.707766	4.79632
		0.707767	4.86805
		0.707768	4.94089
		0.707768	5.01484
		0.707769	5.08993
		0.70777	5.16617
		0.70777	5.24357
		0.707771	5.32217
		0.707772	5.40196
		0.707772	5.48298
		0.707773	5.56524
		0.707774	5.64876
		0.707774	5.73356
		0.707775	5.81965
		0.707776	5.90706
		0.707776	5.99581
		0.707777	6.08591
		0.707777	6.17739
		0.707778	6.27026
		0.707779	6.36456
		0.707779	6.46029
		0.70778	6.55748
		0.707781	6.65615
		0.707781	6.75632
		0.707782	6.85801
		0.707783	6.96126
		0.707783	7.06607
		0.707784	7.17248
		0.707785	7.2805
		0.707785	7.39016
		0.707786	7.50149
		0.707787	7.6145
		0.707787	7.72923
		0.707788	7.84569
		0.707789	7.96392
		0.707789	8.08393
		0.70779	8.20575
		0.70779	8.32942
		0.707791	8.45495
		0.707792	8.58238
		0.707792	8.71172
		0.707793	8.84301
		0.707794	8.97628
		0.707794	9.11155
		0.707795	9.24885
		0.707796	9.38821
		0.707796	9.52966
		0.707797	9.67323
		0.707798	9.81895
		0.707798	9.96685
		0.707799	10.117
		0.7078	10.2693
		0.7078	10.4239
		0.707801	10.5809
		0.707801	10.7401
		0.707802	10.9018
		0.707803	11.0658
		0.707803	11.2323
		0.707804	11.4012
		0.707805	11.5727
		0.707805	11.7466
		0.707806	11.9232
		0.707807	12.1024
		0.707807	12.2842
		0.707808	12.4687
		0.707809	12.6559
		0.707809	12.8458
		0.70781	13.0386
		0.707811	13.2341
		0.707811	13.4326
		0.707812	13.6339
		0.707813	13.8382
		0.707813	14.0455
		0.707814	14.2558
		0.707815	14.4692
		0.707815	14.6857
		0.707816	14.9053
		0.707816	15.1281
		0.707817	15.3541
		0.707818	15.5835
		0.707818	15.8161
		0.707819	16.0521
		0.70782	16.2915
		0.70782	16.5343
		0.707821	16.7807
		0.707822	17.0306
		0.707822	17.284
		0.707823	17.5411
		0.707824	17.8019
		0.707824	18.0664
		0.707825	18.3347
		0.707826	18.6068
		0.707826	18.8828
		0.707827	19.1627
		0.707828	19.4466
		0.707828	19.7345
		0.707829	20.0265
		0.707829	20.3226
		0.70783	20.6229
		0.707831	20.9274
		0.707831	21.2362
		0.707832	21.5493
		0.707833	21.8668
		0.707833	22.1888
		0.707834	22.5153
		0.707835	22.8463
		0.707835	23.182
		0.707836	23.5223
		0.707837	23.8673
		0.707837	24.2171
		0.707838	24.5718
		0.707839	24.9314
		0.707839	25.2959
		0.70784	25.6655
		0.70784	26.0401
		0.707841	26.4199
		0.707842	26.8049
		0.707842	27.1952
		0.707843	27.5908
		0.707844	27.9918
		0.707844	28.3982
		0.707845	28.8102
		0.707846	29.2278
		0.707846	29.651
		0.707847	30.08
		0.707848	30.5147
		0.707848	30.9553
		0.707849	31.4018
		0.70785	31.8544
		0.70785	32.3129
		0.707851	32.7776
		0.707852	33.2486
		0.707852	33.7258
		0.707853	34.2093
		0.707854	34.6993
		0.707854	35.1957
		0.707855	35.6987
		0.707855	36.2084
		0.707856	36.7248
		0.707857	37.2479
		0.707857	37.778
		0.707858	38.3149
		0.707859	38.8589
		0.707859	39.41
		0.70786	39.9683
		0.707861	40.5338
		0.707861	41.1067
		0.707862	41.687
		0.707863	42.2748
		0.707863	42.8701
		0.707864	43.4732
		0.707865	44.0839
		0.707865	44.7025
		0.707866	45.329
		0.707866	45.9635
		0.707867	46.6061
		0.707868	47.2569
		0.707868	47.9159
		0.707869	48.5832
		0.70787	49.259
		0.70787	49.9433
		0.707871	50.6362
		0.707872	51.3378
		0.707872	52.0481
		0.707873	52.7674
		0.707874	53.4956
		0.707874	54.2329
		0.707875	54.9794
		0.707876	55.7351
		0.707876	56.5001
		0.707877	57.2746
		0.707878	58.0586
		0.707878	58.8522
		0.707879	59.6556
		0.707879	60.4688
		0.70788	61.2919
		0.707881	62.125
		0.707881	62.9682
		0.707882	63.8217
		0.707883	64.6855
		0.707883	65.5597
		0.707884	66.4444
		0.707885	67.3397
		0.707885	68.2458
		0.707886	69.1627
		0.707887	70.0905
		0.707887	71.0294
		0.707888	71.9794
		0.707889	72.9406
		0.707889	73.9132
		0.70789	74.8973
		0.707891	75.8929
		0.707891	76.9002
		0.707892	77.9193
		0.707893	78.9503
		0.707893	79.9933
		0.707894	81.0484
		0.707894	82.1158
		0.707895	83.1955
		0.707896	84.2876
		0.707896	85.3923
		0.707897	86.5096
		0.707898	87.6398
		0.707898	88.7829
		0.707899	89.939
		0.7079	91.1082
		0.7079	92.2906
		0.707901	93.4865
		0.707902	94.6958
		0.707902	95.9187
		0.707903	97.1554
		0.707904	98.4059
		0.707904	99.6703
		0.707905	100.949
		0.707905	102.242
		0.707906	103.549
		0.707907	104.87
		0.707907	106.206
		0.707908	107.557
		0.707909	108.922
		0.707909	110.303
		0.70791	111.698
		0.707911	113.109
		0.707911	114.535
		0.707912	115.976
		0.707913	117.433
		0.707913	118.906
		0.707914	120.394
		0.707915	121.899
		0.707915	123.419
		0.707916	124.956
		0.707917	126.508
		0.707917	128.078
		0.707918	129.664
		0.707919	131.266
		0.707919	132.886
		0.70792	134.522
		0.70792	136.175
		0.707921	137.846
		0.707922	139.534
		0.707922	141.239
		0.707923	142.962
		0.707924	144.703
		0.707924	146.462
		0.707925	148.238
		0.707926	150.033
		0.707926	151.846
		0.707927	153.677
		0.707928	155.527
		0.707928	157.395
		0.707929	159.282
		0.70793	161.188
		0.70793	163.114
		0.707931	165.058
		0.707932	167.022
		0.707932	169.005
		0.707933	171.007
		0.707933	173.029
		0.707934	175.072
		0.707935	177.134
		0.707935	179.216
		0.707936	181.318
		0.707937	183.441
		0.707937	185.584
		0.707938	187.748
		0.707939	189.933
		0.707939	192.138
		0.70794	194.365
		0.707941	196.612
		0.707941	198.881
		0.707942	201.171
		0.707943	203.483
		0.707943	205.816
		0.707944	208.172
		0.707944	210.549
		0.707945	212.948
		0.707946	215.369
		0.707946	217.813
		0.707947	220.279
		0.707948	222.768
		0.707948	225.279
		0.707949	227.813
		0.70795	230.37
		0.70795	232.95
		0.707951	235.554
		0.707952	238.18
		0.707952	240.83
		0.707953	243.504
		0.707954	246.201
		0.707954	248.922
		0.707955	251.667
		0.707956	254.436
		0.707956	257.229
		0.707957	260.047
		0.707958	262.889
		0.707958	265.755
		0.707959	268.646
		0.707959	271.561
		0.70796	274.502
		0.707961	277.467
		0.707961	280.458
		0.707962	283.474
		0.707963	286.515
		0.707963	289.581
		0.707964	292.673
		0.707965	295.79
		0.707965	298.934
		0.707966	302.103
		0.707967	305.298
		0.707967	308.519
		0.707968	311.766
		0.707969	315.039
		0.707969	318.339
		0.70797	321.665
		0.70797	325.018
		0.707971	328.397
		0.707972	331.803
		0.707972	335.236
		0.707973	338.695
		0.707974	342.182
		0.707974	345.695
		0.707975	349.236
		0.707976	352.804
		0.707976	356.399
		0.707977	360.022
		0.707978	363.672
		0.707978	367.35
		0.707979	371.055
		0.70798	374.788
		0.70798	378.549
		0.707981	382.337
		0.707982	386.154
		0.707982	389.998
		0.707983	393.87
		0.707983	397.771
		0.707984	401.699
		0.707985	405.656
		0.707985	409.641
		0.707986	413.654
		0.707987	417.695
		0.707987	421.765
		0.707988	425.864
		0.707989	429.99
		0.707989	434.146
		0.70799	438.33
		0.707991	442.542
		0.707991	446.783
		0.707992	451.053
		0.707993	455.351
		0.707993	459.678
		0.707994	464.034
		0.707995	468.419
		0.707995	472.832
		0.707996	477.274
		0.707997	481.745
		0.707997	486.245
		0.707998	490.774
		0.707998	495.331
		0.707999	499.917
		0.708	504.532
		0.708	509.176
		0.708001	513.849
		0.708002	518.55
		0.708002	523.28
		0.708003	528.039
		0.708004	532.827
		0.708004	537.643
		0.708005	542.489
		0.708006	547.363
		0.708006	552.265
		0.708007	557.196
		0.708008	562.156
		0.708008	567.144
		0.708009	572.161
		0.708009	577.206
		0.70801	582.28
		0.708011	587.382
		0.708011	592.512
		0.708012	597.671
		0.708013	602.857
		0.708013	608.072
		0.708014	613.315
		0.708015	618.586
		0.708015	623.885
		0.708016	629.211
		0.708017	634.566
		0.708017	639.948
		0.708018	645.357
		0.708019	650.794
		0.708019	656.258
		0.70802	661.75
		0.708021	667.269
		0.708021	672.815
		0.708022	678.388
		0.708022	683.987
		0.708023	689.614
		0.708024	695.267
		0.708024	700.946
		0.708025	706.652
		0.708026	712.384
		0.708026	718.142
		0.708027	723.926
		0.708028	729.736
		0.708028	735.572
		0.708029	741.433
		0.70803	747.319
		0.70803	753.23
		0.708031	759.167
		0.708032	765.129
		0.708032	771.115
		0.708033	777.125
		0.708034	783.16
		0.708034	789.22
		0.708035	795.303
		0.708036	801.41
		0.708036	807.54
		0.708037	813.694
		0.708037	819.872
		0.708038	826.072
		0.708039	832.295
		0.708039	838.54
		0.70804	844.808
		0.708041	851.099
		0.708041	857.411
		0.708042	863.744
		0.708043	870.1
		0.708043	876.476
		0.708044	882.874
		0.708045	889.292
		0.708045	895.731
		0.708046	902.19
		0.708047	908.67
		0.708047	915.169
		0.708048	921.687
		0.708048	928.225
		0.708049	934.782
		0.70805	941.358
		0.70805	947.952
		0.708051	954.564
		0.708052	961.194
		0.708052	967.842
		0.708053	974.507
		0.708054	981.189
		0.708054	987.888
		0.708055	994.603
		0.708056	1001.33
		0.708056	1008.08
		0.708057	1014.85
		0.708058	1021.62
		0.708058	1028.42
		0.708059	1035.22
		0.70806	1042.05
		0.70806	1048.88
		0.708061	1055.73
		0.708062	1062.6
		0.708062	1069.47
		0.708063	1076.36
		0.708063	1083.26
		0.708064	1090.18
		0.708065	1097.1
		0.708065	1104.04
		0.708066	1110.98
		0.708067	1117.94
		0.708067	1124.91
		0.708068	1131.89
		0.708069	1138.88
		0.708069	1145.87
		0.70807	1152.88
		0.708071	1159.89
		0.708071	1166.91
		0.708072	1173.95
		0.708073	1180.98
		0.708073	1188.03
		0.708074	1195.08
		0.708074	1202.14
		0.708075	1209.2
		0.708076	1216.27
		0.708076	1223.34
		0.708077	1230.42
		0.708078	1237.51
		0.708078	1244.59
		0.708079	1251.68
		0.70808	1258.78
		0.70808	1265.88
		0.708081	1272.98
		0.708082	1280.08
		0.708082	1287.18
		0.708083	1294.29
		0.708084	1301.39
		0.708084	1308.5
		0.708085	1315.61
		0.708086	1322.71
		0.708086	1329.82
		0.708087	1336.93
		0.708087	1344.03
		0.708088	1351.13
		0.708089	1358.23
		0.708089	1365.33
		0.70809	1372.42
		0.708091	1379.52
		0.708091	1386.6
		0.708092	1393.69
		0.708093	1400.77
		0.708093	1407.84
		0.708094	1414.91
		0.708095	1421.97
		0.708095	1429.03
		0.708096	1436.08
		0.708097	1443.13
		0.708097	1450.17
		0.708098	1457.2
		0.708099	1464.22
		0.708099	1471.24
		0.7081	1478.24
		0.708101	1485.24
		0.708101	1492.23
		0.708102	1499.21
		0.708102	1506.17
		0.708103	1513.13
		0.708104	1520.08
		0.708104	1527.02
		0.708105	1533.94
		0.708106	1540.86
		0.708106	1547.76
		0.708107	1554.65
		0.708108	1561.53
		0.708108	1568.39
		0.708109	1575.24
		0.70811	1582.08
		0.70811	1588.9
		0.708111	1595.71
		0.708112	1602.51
		0.708112	1609.29
		0.708113	1616.05
		0.708113	1622.8
		0.708114	1629.54
		0.708115	1636.25
		0.708115	1642.96
		0.708116	1649.64
		0.708117	1656.31
		0.708117	1662.96
		0.708118	1669.6
		0.708119	1676.21
		0.708119	1682.81
		0.70812	1689.39
		0.708121	1695.96
		0.708121	1702.5
		0.708122	1709.03
		0.708123	1715.54
		0.708123	1722.02
		0.708124	1728.49
		0.708125	1734.94
		0.708125	1741.37
		0.708126	1747.78
		0.708126	1754.17
		0.708127	1760.54
		0.708128	1766.89
		0.708128	1773.22
		0.708129	1779.52
		0.70813	1785.81
		0.70813	1792.07
		0.708131	1798.32
		0.708132	1804.54
		0.708132	1810.74
		0.708133	1816.92
		0.708134	1823.08
		0.708134	1829.22
		0.708135	1835.33
		0.708136	1841.42
		0.708136	1847.49
		0.708137	1853.54
		0.708138	1859.57
		0.708138	1865.57
		0.708139	1871.55
		0.70814	1877.51
		0.70814	1883.44
		0.708141	1889.36
		0.708141	1895.25
		0.708142	1901.11
		0.708143	1906.96
		0.708143	1912.78
		0.708144	1918.58
		0.708145	1924.36
		0.708145	1930.11
		0.708146	1935.84
		0.708147	1941.55
		0.708147	1947.23
		0.708148	1952.89
		0.708149	1958.53
		0.708149	1964.15
		0.70815	1969.74
		0.708151	1975.31
		0.708151	1980.86
		0.708152	1986.39
		0.708152	1991.89
		0.708153	1997.37
		0.708154	2002.83
		0.708154	2008.26
		0.708155	2013.67
		0.708156	2019.06
		0.708156	2024.43
		0.708157	2029.78
		0.708158	2035.1
		0.708158	2040.4
		0.708159	2045.68
		0.70816	2050.94
		0.70816	2056.18
		0.708161	2061.39
		0.708162	2066.58
		0.708162	2071.75
		0.708163	2076.9
		0.708164	2082.03
		0.708164	2087.14
		0.708165	2092.22
		0.708166	2097.29
		0.708166	2102.33
		0.708167	2107.35
		0.708167	2112.36
		0.708168	2117.34
		0.708169	2122.3
		0.708169	2127.24
		0.70817	2132.16
		0.708171	2137.06
		0.708171	2141.94
		0.708172	2146.81
		0.708173	2151.65
		0.708173	2156.47
		0.708174	2161.27
		0.708175	2166.06
		0.708175	2170.82
		0.708176	2175.57
		0.708177	2180.29
		0.708177	2185
		0.708178	2189.69
		0.708179	2194.36
		0.708179	2199.01
		0.70818	2203.65
		0.70818	2208.26
		0.708181	2212.86
		0.708182	2217.44
		0.708182	2222
		0.708183	2226.55
		0.708184	2231.07
		0.708184	2235.58
		0.708185	2240.08
		0.708186	2244.55
		0.708186	2249.01
		0.708187	2253.45
		0.708188	2257.87
		0.708188	2262.28
		0.708189	2266.67
		0.70819	2271.05
		0.70819	2275.41
		0.708191	2279.75
		0.708191	2284.07
		0.708192	2288.38
		0.708193	2292.67
		0.708193	2296.95
		0.708194	2301.21
		0.708195	2305.46
		0.708195	2309.69
		0.708196	2313.9
		0.708197	2318.1
		0.708197	2322.28
		0.708198	2326.45
		0.708199	2330.6
		0.708199	2334.73
		0.7082	2338.85
		0.708201	2342.95
		0.708201	2347.04
		0.708202	2351.12
		0.708203	2355.17
		0.708203	2359.22
		0.708204	2363.24
		0.708205	2367.26
		0.708205	2371.25
		0.708206	2375.23
		0.708206	2379.2
		0.708207	2383.15
		0.708208	2387.08
		0.708208	2391
		0.708209	2394.9
		0.70821	2398.79
		0.70821	2402.66
		0.708211	2406.52
		0.708212	2410.36
		0.708212	2414.19
		0.708213	2417.99
		0.708214	2421.79
		0.708214	2425.56
		0.708215	2429.33
		0.708216	2433.07
		0.708216	2436.8
		0.708217	2440.51
		0.708217	2444.21
		0.708218	2447.89
		0.708219	2451.55
		0.708219	2455.19
		0.70822	2458.82
		0.708221	2462.43
		0.708221	2466.03
		0.708222	2469.61
		0.708223	2473.17
		0.708223	2476.71
		0.708224	2480.23
		0.708225	2483.74
		0.708225	2487.23
		0.708226	2490.7
		0.708227	2494.15
		0.708227	2497.58
		0.708228	2501
		0.708229	2504.39
		0.708229	2507.77
		0.70823	2511.12
		0.70823	2514.46
		0.708231	2517.78
		0.708232	2521.07
		0.708232	2524.35
		0.708233	2527.61
		0.708234	2530.84
		0.708234	2534.06
		0.708235	2537.25
		0.708236	2540.42
		0.708236	2543.57
		0.708237	2546.7
		0.708238	2549.8
		0.708238	2552.89
		0.708239	2555.95
		0.70824	2558.99
		0.70824	2562
		0.708241	2564.99
		0.708242	2567.96
		0.708242	2570.9
		0.708243	2573.82
		0.708244	2576.72
		0.708244	2579.59
		0.708245	2582.43
		0.708245	2585.25
		0.708246	2588.05
		0.708247	2590.81
		0.708247	2593.55
		0.708248	2596.27
		0.708249	2598.96
		0.708249	2601.62
		0.70825	2604.25
		0.708251	2606.85
		0.708251	2609.43
		0.708252	2611.98
		0.708253	2614.49
		0.708253	2616.98
		0.708254	2619.44
		0.708255	2621.88
		0.708255	2624.28
		0.708256	2626.64
		0.708256	2628.98
		0.708257	2631.29
		0.708258	2633.57
		0.708258	2635.81
		0.708259	2638.02
		0.70826	2640.2
		0.70826	2642.35
		0.708261	2644.46
		0.708262	2646.54
		0.708262	2648.59
		0.708263	2650.6
		0.708264	2652.58
		0.708264	2654.52
		0.708265	2656.43
		0.708266	2658.3
		0.708266	2660.14
		0.708267	2661.94
		0.708268	2663.7
		0.708268	2665.42
		0.708269	2667.11
		0.708269	2668.76
		0.70827	2670.38
		0.708271	2671.95
		0.708271	2673.49
		0.708272	2674.98
		0.708273	2676.44
		0.708273	2677.86
		0.708274	2679.23
		0.708275	2680.57
		0.708275	2681.87
		0.708276	2683.12
		0.708277	2684.33
		0.708277	2685.51
		0.708278	2686.64
		0.708279	2687.72
		0.708279	2688.77
		0.70828	2689.77
		0.708281	2690.72
		0.708281	2691.64
		0.708282	2692.51
		0.708283	2693.33
		0.708283	2694.11
		0.708284	2694.85
		0.708284	2695.53
		0.708285	2696.18
		0.708286	2696.78
		0.708286	2697.33
		0.708287	2697.83
		0.708288	2698.29
		0.708288	2698.7
		0.708289	2699.06
		0.70829	2699.37
		0.70829	2699.63
		0.708291	2699.85
		0.708292	2700.02
		0.708292	2700.14
		0.708293	2700.2
		0.708294	2700.22
		0.708294	2700.19
		0.708295	2700.11
		0.708295	2699.97
		0.708296	2699.79
		0.708297	2699.55
		0.708297	2699.27
		0.708298	2698.93
		0.708299	2698.53
		0.708299	2698.09
		0.7083	2697.59
		0.708301	2697.04
		0.708301	2696.44
		0.708302	2695.78
		0.708303	2695.07
		0.708303	2694.31
		0.708304	2693.49
		0.708305	2692.61
		0.708305	2691.68
		0.708306	2690.7
		0.708307	2689.66
		0.708307	2688.56
		0.708308	2687.41
		0.708309	2686.21
		0.708309	2684.94
		0.70831	2683.62
		0.70831	2682.25
		0.708311	2680.81
		0.708312	2679.32
		0.708312	2677.77
		0.708313	2676.17
		0.708314	2674.5
		0.708314	2672.78
		0.708315	2671
		0.708316	2669.17
		0.708316	2667.27
		0.708317	2665.31
		0.708318	2663.3
		0.708318	2661.23
		0.708319	2659.1
		0.70832	2656.91
		0.70832	2654.66
		0.708321	2652.35
		0.708321	2649.98
		0.708322	2647.55
		0.708323	2645.06
		0.708323	2642.51
		0.708324	2639.9
		0.708325	2637.23
		0.708325	2634.5
		0.708326	2631.71
		0.708327	2628.86
		0.708327	2625.94
		0.708328	2622.97
		0.708329	2619.94
		0.708329	2616.84
		0.70833	2613.69
		0.708331	2610.47
		0.708331	2607.19
		0.708332	2603.86
		0.708333	2600.46
		0.708333	2597
		0.708334	2593.47
		0.708334	2589.89
		0.708335	2586.25
		0.708336	2582.54
		0.708336	2578.78
		0.708337	2574.95
		0.708338	2571.06
		0.708338	2567.11
		0.708339	2563.1
		0.70834	2559.03
		0.70834	2554.9
		0.708341	2550.7
		0.708342	2546.45
		0.708342	2542.13
		0.708343	2537.76
		0.708344	2533.32
		0.708344	2528.83
		0.708345	2524.27
		0.708346	2519.65
		0.708346	2514.98
		0.708347	2510.24
		0.708348	2505.44
		0.708348	2500.59
		0.708349	2495.67
		0.708349	2490.7
		0.70835	2485.66
		0.708351	2480.57
		0.708351	2475.41
		0.708352	2470.2
		0.708353	2464.93
		0.708353	2459.61
		0.708354	2454.22
		0.708355	2448.78
		0.708355	2443.28
		0.708356	2437.72
		0.708357	2432.1
		0.708357	2426.43
		0.708358	2420.7
		0.708359	2414.92
		0.708359	2409.08
		0.70836	2403.18
		0.70836	2397.23
		0.708361	2391.22
		0.708362	2385.16
		0.708362	2379.04
		0.708363	2372.87
		0.708364	2366.65
		0.708364	2360.37
		0.708365	2354.04
		0.708366	2347.65
		0.708366	2341.22
		0.708367	2334.73
		0.708368	2328.19
		0.708368	2321.6
		0.708369	2314.96
		0.70837	2308.27
		0.70837	2301.52
		0.708371	2294.73
		0.708372	2287.89
		0.708372	2281
		0.708373	2274.06
		0.708373	2267.08
		0.708374	2260.05
		0.708375	2252.97
		0.708375	2245.84
		0.708376	2238.67
		0.708377	2231.45
		0.708377	2224.19
		0.708378	2216.88
		0.708379	2209.53
		0.708379	2202.14
		0.70838	2194.7
		0.708381	2187.22
		0.708381	2179.7
		0.708382	2172.14
		0.708383	2164.53
		0.708383	2156.89
		0.708384	2149.2
		0.708385	2141.48
		0.708385	2133.72
		0.708386	2125.92
		0.708387	2118.08
		0.708387	2110.21
		0.708388	2102.3
		0.708388	2094.36
		0.708389	2086.38
		0.70839	2078.36
		0.70839	2070.31
		0.708391	2062.23
		0.708392	2054.11
		0.708392	2045.97
		0.708393	2037.79
		0.708394	2029.58
		0.708394	2021.34
		0.708395	2013.07
		0.708396	2004.77
		0.708396	1996.45
		0.708397	1988.09
		0.708398	1979.71
		0.708398	1971.3
		0.708399	1962.87
		0.708399	1954.41
		0.7084	1945.93
		0.708401	1937.42
		0.708401	1928.89
		0.708402	1920.34
		0.708403	1911.77
		0.708403	1903.17
		0.708404	1894.56
		0.708405	1885.92
		0.708405	1877.27
		0.708406	1868.59
		0.708407	1859.9
		0.708407	1851.19
		0.708408	1842.47
		0.708409	1833.73
		0.708409	1824.97
		0.70841	1816.2
		0.708411	1807.42
		0.708411	1798.62
		0.708412	1789.81
		0.708413	1780.99
		0.708413	1772.16
		0.708414	1763.32
		0.708414	1754.46
		0.708415	1745.6
		0.708416	1736.73
		0.708416	1727.85
		0.708417	1718.97
		0.708418	1710.07
		0.708418	1701.18
		0.708419	1692.27
		0.70842	1683.36
		0.70842	1674.45
		0.708421	1665.54
		0.708422	1656.62
		0.708422	1647.7
		0.708423	1638.78
		0.708424	1629.85
		0.708424	1620.93
		0.708425	1612.01
		0.708426	1603.09
		0.708426	1594.17
		0.708427	1585.25
		0.708427	1576.34
		0.708428	1567.43
		0.708429	1558.53
		0.708429	1549.63
		0.70843	1540.73
		0.708431	1531.84
		0.708431	1522.96
		0.708432	1514.08
		0.708433	1505.22
		0.708433	1496.36
		0.708434	1487.51
		0.708435	1478.67
		0.708435	1469.84
		0.708436	1461.02
		0.708437	1452.21
		0.708437	1443.41
		0.708438	1434.63
		0.708438	1425.85
		0.708439	1417.1
		0.70844	1408.35
		0.70844	1399.62
		0.708441	1390.91
		0.708442	1382.21
		0.708442	1373.52
		0.708443	1364.86
		0.708444	1356.21
		0.708444	1347.58
		0.708445	1338.96
		0.708446	1330.37
		0.708446	1321.79
		0.708447	1313.23
		0.708448	1304.69
		0.708448	1296.18
		0.708449	1287.68
		0.70845	1279.21
		0.70845	1270.75
		0.708451	1262.32
		0.708452	1253.91
		0.708452	1245.53
		0.708453	1237.16
		0.708453	1228.83
		0.708454	1220.51
		0.708455	1212.22
		0.708455	1203.96
		0.708456	1195.72
		0.708457	1187.51
		0.708457	1179.32
		0.708458	1171.16
		0.708459	1163.02
		0.708459	1154.92
		0.70846	1146.84
		0.708461	1138.79
		0.708461	1130.76
		0.708462	1122.77
		0.708463	1114.81
		0.708463	1106.87
		0.708464	1098.96
		0.708464	1091.09
		0.708465	1083.24
		0.708466	1075.42
		0.708466	1067.64
		0.708467	1059.88
		0.708468	1052.16
		0.708468	1044.47
		0.708469	1036.81
		0.70847	1029.18
		0.70847	1021.58
		0.708471	1014.02
		0.708472	1006.49
		0.708472	998.993
		0.708473	991.528
		0.708474	984.097
		0.708474	976.7
		0.708475	969.336
		0.708476	962.007
		0.708476	954.711
		0.708477	947.45
		0.708477	940.224
		0.708478	933.032
		0.708479	925.875
		0.708479	918.753
		0.70848	911.666
		0.708481	904.615
		0.708481	897.599
		0.708482	890.619
		0.708483	883.675
		0.708483	876.766
		0.708484	869.894
		0.708485	863.057
		0.708485	856.257
		0.708486	849.493
		0.708487	842.765
		0.708487	836.074
		0.708488	829.42
		0.708489	822.802
		0.708489	816.221
		0.70849	809.677
		0.708491	803.17
		0.708491	796.7
		0.708492	790.266
		0.708492	783.87
		0.708493	777.511
		0.708494	771.189
		0.708494	764.904
		0.708495	758.657
		0.708496	752.446
		0.708496	746.273
		0.708497	740.137
		0.708498	734.039
		0.708498	727.977
		0.708499	721.953
		0.7085	715.967
		0.7085	710.017
		0.708501	704.105
		0.708502	698.23
		0.708502	692.393
		0.708503	686.592
		0.708503	680.829
		0.708504	675.103
		0.708505	669.414
		0.708505	663.762
		0.708506	658.147
		0.708507	652.57
		0.708507	647.029
		0.708508	641.525
		0.708509	636.058
		0.708509	630.627
		0.70851	625.234
		0.708511	619.877
		0.708511	614.556
		0.708512	609.272
		0.708513	604.025
		0.708513	598.814
		0.708514	593.639
		0.708515	588.5
		0.708515	583.398
		0.708516	578.331
		0.708516	573.3
		0.708517	568.305
		0.708518	563.346
		0.708518	558.422
		0.708519	553.534
		0.70852	548.681
		0.70852	543.864
		0.708521	539.081
		0.708522	534.334
		0.708522	529.621
		0.708523	524.944
		0.708524	520.301
		0.708524	515.692
		0.708525	511.118
		0.708526	506.578
		0.708526	502.072
		0.708527	497.601
		0.708528	493.163
		0.708528	488.759
		0.708529	484.388
		0.70853	480.051
		0.70853	475.748
		0.708531	471.477
		0.708531	467.24
		0.708532	463.035
		0.708533	458.863
		0.708533	454.723
		0.708534	450.616
		0.708535	446.542
		0.708535	442.499
		0.708536	438.488
		0.708537	434.509
		0.708537	430.562
		0.708538	426.646
		0.708539	422.762
		0.708539	418.908
		0.70854	415.086
		0.708541	411.294
		0.708541	407.533
		0.708542	403.803
		0.708542	400.103
		0.708543	396.433
		0.708544	392.793
		0.708544	389.182
		0.708545	385.602
		0.708546	382.05
		0.708546	378.528
		0.708547	375.036
		0.708548	371.572
		0.708548	368.137
		0.708549	364.73
		0.70855	361.352
		0.70855	358.002
		0.708551	354.68
		0.708552	351.386
		0.708552	348.12
		0.708553	344.882
		0.708554	341.67
		0.708554	338.486
		0.708555	335.329
		0.708556	332.199
		0.708556	329.095
		0.708557	326.018
		0.708557	322.967
		0.708558	319.943
		0.708559	316.944
		0.708559	313.971
		0.70856	311.024
		0.708561	308.102
		0.708561	305.205
		0.708562	302.333
		0.708563	299.487
		0.708563	296.665
		0.708564	293.867
		0.708565	291.094
		0.708565	288.345
		0.708566	285.62
		0.708567	282.919
		0.708567	280.242
		0.708568	277.588
		0.708568	274.957
		0.708569	272.35
		0.70857	269.766
		0.70857	267.204
		0.708571	264.665
		0.708572	262.148
		0.708572	259.654
		0.708573	257.182
		0.708574	254.732
		0.708574	252.304
		0.708575	249.897
		0.708576	247.512
		0.708576	245.148
		0.708577	242.805
		0.708578	240.483
		0.708578	238.182
		0.708579	235.901
		0.70858	233.641
		0.70858	231.402
		0.708581	229.182
		0.708581	226.983
		0.708582	224.803
		0.708583	222.643
		0.708583	220.502
		0.708584	218.381
		0.708585	216.279
		0.708585	214.196
		0.708586	212.132
		0.708587	210.086
		0.708587	208.06
		0.708588	206.051
		0.708589	204.061
		0.708589	202.089
		0.70859	200.135
		0.708591	198.198
		0.708591	196.28
		0.708592	194.379
		0.708593	192.495
		0.708593	190.628
		0.708594	188.779
		0.708595	186.947
		0.708595	185.131
		0.708596	183.332
		0.708596	181.549
		0.708597	179.783
		0.708598	178.033
		0.708598	176.299
		0.708599	174.581
		0.7086	172.879
		0.7086	171.192
		0.708601	169.522
		0.708602	167.866
		0.708602	166.226
		0.708603	164.601
		0.708604	162.99
		0.708604	161.395
		0.708605	159.815
		0.708606	158.249
		0.708606	156.697
		0.708607	155.16
		0.708607	153.638
		0.708608	152.129
		0.708609	150.634
		0.708609	149.153
		0.70861	147.686
		0.708611	146.233
		0.708611	144.793
		0.708612	143.366
		0.708613	141.953
		0.708613	140.552
		0.708614	139.165
		0.708615	137.791
		0.708615	136.429
		0.708616	135.081
		0.708617	133.744
		0.708617	132.421
		0.708618	131.109
		0.708619	129.81
		0.708619	128.523
		0.70862	127.248
		0.70862	125.985
		0.708621	124.733
		0.708622	123.493
		0.708622	122.265
		0.708623	121.049
		0.708624	119.844
		0.708624	118.65
		0.708625	117.467
		0.708626	116.295
		0.708626	115.134
		0.708627	113.984
		0.708628	112.845
		0.708628	111.717
		0.708629	110.599
		0.70863	109.492
		0.70863	108.395
		0.708631	107.308
		0.708632	106.231
		0.708632	105.165
		0.708633	104.109
		0.708634	103.062
		0.708634	102.026
		0.708635	100.999
		0.708635	99.9817
		0.708636	98.974
		0.708637	97.9759
		0.708637	96.9872
		0.708638	96.0077
		0.708639	95.0375
		0.708639	94.0764
		0.70864	93.1244
		0.708641	92.1814
		0.708641	91.2473
		0.708642	90.3219
		0.708643	89.4053
		0.708643	88.4974
		0.708644	87.598
		0.708645	86.7071
		0.708645	85.8247
		0.708646	84.9505
		0.708646	84.0847
		0.708647	83.227
		0.708648	82.3775
		0.708648	81.5359
		0.708649	80.7024
		0.70865	79.8767
		0.70865	79.0589
		0.708651	78.2488
		0.708652	77.4464
		0.708652	76.6516
		0.708653	75.8644
		0.708654	75.0846
		0.708654	74.3122
		0.708655	73.5471
		0.708656	72.7894
		0.708656	72.0388
		0.708657	71.2954
		0.708658	70.559
		0.708658	69.8296
		0.708659	69.1072
		0.708659	68.3917
		0.70866	67.6829
		0.708661	66.981
		0.708661	66.2857
		0.708662	65.597
		0.708663	64.915
		0.708663	64.2394
		0.708664	63.5703
		0.708665	62.9076
		0.708665	62.2512
		0.708666	61.6011
		0.708667	60.9572
		0.708667	60.3194
		0.708668	59.6878
		0.708669	59.0623
		0.708669	58.4427
		0.70867	57.8291
		0.708671	57.2213
		0.708671	56.6194
		0.708672	56.0233
		0.708672	55.4329
		0.708673	54.8482
		0.708674	54.2691
		0.708674	53.6956
		0.708675	53.1276
		0.708676	52.5651
		0.708676	52.008
		0.708677	51.4563
		0.708678	50.9099
		0.708678	50.3687
		0.708679	49.8329
		0.70868	49.3022
		0.70868	48.7766
		0.708681	48.2561
		0.708682	47.7407
		0.708682	47.2302
		0.708683	46.7247
		0.708684	46.2241
		0.708684	45.7284
		0.708685	45.2375
		0.708685	44.7514
		0.708686	44.27
		0.708687	43.7933
		0.708687	43.3212
		0.708688	42.8537
		0.708689	42.3908
		0.708689	41.9324
		0.70869	41.4785
		0.708691	41.0291
		0.708691	40.584
		0.708692	40.1433
		0.708693	39.7069
		0.708693	39.2748
		0.708694	38.847
		0.708695	38.4233
		0.708695	38.0038
		0.708696	37.5885
		0.708697	37.1772
		0.708697	36.77
		0.708698	36.3668
		0.708699	35.9675
		0.708699	35.5723
		0.7087	35.1809
		0.7087	34.7934
		0.708701	34.4097
		0.708702	34.0299
		0.708702	33.6538
		0.708703	33.2815
		0.708704	32.9128
		0.708704	32.5478
		0.708705	32.1865
		0.708706	31.8288
		0.708706	31.4746
		0.708707	31.124
		0.708708	30.7768
		0.708708	30.4332
		0.708709	30.093
		0.70871	29.7562
		0.70871	29.4227
		0.708711	29.0927
		0.708711	28.7659
		0.708712	28.4424
		0.708713	28.1222
		0.708713	27.8053
		0.708714	27.4915
		0.708715	27.1809
		0.708715	26.8734
		0.708716	26.569
		0.708717	26.2678
		0.708717	25.9696
		0.708718	25.6744
		0.708719	25.3822
		0.708719	25.093
		0.70872	24.8068
		0.708721	24.5234
		0.708721	24.243
		0.708722	23.9654
		0.708723	23.6907
		0.708723	23.4188
		0.708724	23.1496
		0.708724	22.8833
		0.708725	22.6196
		0.708726	22.3587
		0.708726	22.1005
		0.708727	21.8449
		0.708728	21.592
		0.708728	21.3417
		0.708729	21.094
		0.70873	20.8489
		0.70873	20.6063
		0.708731	20.3662
		0.708732	20.1286
		0.708732	19.8935
		0.708733	19.6609
		0.708734	19.4307
		0.708734	19.2029
		0.708735	18.9774
		0.708736	18.7544
		0.708736	18.5336
		0.708737	18.3152
		0.708738	18.0991
		0.708738	17.8853
		0.708739	17.6737
		0.708739	17.4644
		0.70874	17.2573
		0.708741	17.0524
		0.708741	16.8496
		0.708742	16.649
		0.708743	16.4505
		0.708743	16.2542
		0.708744	16.0599
		0.708745	15.8677
		0.708745	15.6776
		0.708746	15.4895
		0.708747	15.3034
		0.708747	15.1193
		0.708748	14.9372
		0.708749	14.757
		0.708749	14.5788
		0.70875	14.4025
		0.70875	14.2282
		0.708751	14.0557
		0.708752	13.885
		0.708752	13.7163
		0.708753	13.5493
		0.708754	13.3842
		0.708754	13.2209
		0.708755	13.0593
		0.708756	12.8995
		0.708756	12.7415
		0.708757	12.5852
		0.708758	12.4306
		0.708758	12.2777
		0.708759	12.1265
		0.70876	11.977
		0.70876	11.8291
		0.708761	11.6829
		0.708762	11.5382
		0.708762	11.3952
		0.708763	11.2538
		0.708763	11.1139
		0.708764	10.9756
		0.708765	10.8388
		0.708765	10.7035
		0.708766	10.5698
		0.708767	10.4376
		0.708767	10.3068
		0.708768	10.1775
		0.708769	10.0497
		0.708769	9.92332
		0.70877	9.79835
		0.708771	9.6748
		0.708771	9.55264
		0.708772	9.43187
		0.708773	9.31246
		0.708773	9.19442
		0.708774	9.07772
		0.708775	8.96234
		0.708775	8.84829
		0.708776	8.73554
		0.708777	8.62408
		0.708777	8.51389
		0.708778	8.40498
		0.708778	8.29731
		0.708779	8.19089
		0.70878	8.08569
		0.70878	7.98171
		0.708781	7.87893
		0.708782	7.77734
		0.708782	7.67694
		0.708783	7.5777
		0.708784	7.47961
		0.708784	7.38267
		0.708785	7.28686
		0.708786	7.19217
		0.708786	7.09859
		0.708787	7.0061
		0.708788	6.91471
		0.708788	6.82438
		0.708789	6.73513
		0.708789	6.64692
		0.70879	6.55976
		0.708791	6.47363
		0.708791	6.38852
		0.708792	6.30443
		0.708793	6.22133
		0.708793	6.13922
		0.708794	6.05809
		0.708795	5.97793
		0.708795	5.89873
		0.708796	5.82048
		0.708797	5.74317
		0.708797	5.66679
		0.708798	5.59133
		0.708799	5.51677
		0.708799	5.44312
		0.7088	5.37036
		0.708801	5.29848
		0.708801	5.22747
		0.708802	5.15732
		0.708803	5.08803
		0.708803	5.01958
		0.708804	4.95197
		0.708804	4.88519
		0.708805	4.81922
		0.708806	4.75406
		0.708806	4.6897
		0.708807	4.62613
		0.708808	4.56335
		0.708808	4.50134
		0.708809	4.4401
		0.70881	4.37961
		0.70881	4.31988
		0.708811	4.26088
		0.708812	4.20262
		0.708812	4.14509
		0.708813	4.08827
		0.708814	4.03216
		0.708814	3.97675
		0.708815	3.92204
		0.708815	3.86802
		0.708816	3.81467
		0.708817	3.76199
		0.708817	3.70998
		0.708818	3.65862
		0.708819	3.60792
		0.708819	3.55785
		0.70882	3.50842
		0.708821	3.45962
		0.708821	3.41144
		0.708822	3.36387
		0.708823	3.31691
		0.708823	3.27055
		0.708824	3.22478
		0.708825	3.1796
		0.708825	3.135
		0.708826	3.09097
		0.708827	3.04751
		0.708827	3.00461
		0.708828	2.96226
		0.708828	2.92046
		0.708829	2.8792
		0.70883	2.83847
		0.70883	2.79828
		0.708831	2.7586
		0.708832	2.71945
		0.708832	2.6808
		0.708833	2.64266
		0.708834	2.60502
		0.708834	2.56787
		0.708835	2.53121
		0.708836	2.49503
		0.708836	2.45932
		0.708837	2.42409
		0.708838	2.38932
		0.708838	2.35501
		0.708839	2.32116
		0.70884	2.28775
		0.70884	2.25479
		0.708841	2.22226
		0.708842	2.19017
		0.708842	2.15851
		0.708843	2.12726
		0.708843	2.09644
		0.708844	2.06603
		0.708845	2.03602
		0.708845	2.00642
		0.708846	1.97722
		0.708847	1.94841
		0.708847	1.91999
		0.708848	1.89195
		0.708849	1.86429
		0.708849	1.83701
		0.70885	1.81009
		0.708851	1.78354
		0.708851	1.75736
		0.708852	1.73152
		0.708853	1.70604
		0.708853	1.68091
		0.708854	1.65613
		0.708854	1.63168
		0.708855	1.60756
		0.708856	1.58378
		0.708856	1.56032
		0.708857	1.53719
		0.708858	1.51438
		0.708858	1.49188
		0.708859	1.46969
		0.70886	1.44781
		0.70886	1.42623
		0.708861	1.40495
		0.708862	1.38397
		0.708862	1.36328
		0.708863	1.34288
		0.708864	1.32276
		0.708864	1.30292
		0.708865	1.28336
		0.708866	1.26407
		0.708866	1.24506
		0.708867	1.22631
		0.708867	1.20783
		0.708868	1.1896
		0.708869	1.17164
		0.708869	1.15392
		0.70887	1.13646
		0.708871	1.11924
		0.708871	1.10227
		0.708872	1.08554
		0.708873	1.06905
		0.708873	1.05279
		0.708874	1.03676
		0.708875	1.02096
		0.708875	1.00539
		0.708876	0.990036
		0.708877	0.974905
		0.708877	0.959991
		0.708878	0.945292
		0.708879	0.930803
		0.708879	0.916523
		0.70888	0.902448
		0.708881	0.888577
		0.708881	0.874906
		0.708882	0.861432
		0.708882	0.848154
		0.708883	0.835068
		0.708884	0.822171
		0.708884	0.809463
		0.708885	0.796939
		0.708886	0.784597
		0.708886	0.772436
		0.708887	0.760452
		0.708888	0.748643
		0.708888	0.737007
		0.708889	0.725542
		0.70889	0.714244
		0.70889	0.703113
		0.708891	0.692145
		0.708892	0.681339
		0.708892	0.670692
		0.708893	0.660202
		0.708893	0.649867
		0.708894	0.639685
		0.708895	0.629654
		0.708895	0.619771
		0.708896	0.610035
		0.708897	0.600443
		0.708897	0.590995
		0.708898	0.581687
		0.708899	0.572517
		0.708899	0.563485
[truncated: 1 more rows]

## Sheet: Table S4
Table S4 Sr isotopic composition of the XJ-1 tourmaline analyzed by LA-MC-ICP-MS.
		88Sr volt	85Rb volt	87Sr/86Sr	2SE	87Rb/86Sr	2SE	84Sr/86Sr	2SE
@GIG
Line 1	XJ-1-01	1.32654	0.00027338	0.708031	0.000162431	3.6741e-05	8.72273e-05	0.0563296	0.000123225
	XJ-1-02	1.3803	0.000434552	0.708397	0.000168423	0.000436118	0.000257632	0.0564117	0.000127142
	XJ-1-03	1.27967	0.000430127	0.708245	0.000181257	0.000374561	0.000216796	0.0561189	0.00011747
	XJ-1-04	1.31233	0.00052396	0.708463	0.000173534	0.000485862	0.000331001	0.0564374	0.000110448
	XJ-1-05	1.19856	0.000473033	0.708403	0.00018595	0.000483826	0.00027834	0.0560056	0.000127082
	XJ-1-06	1.25322	0.000407045	0.708308	0.000186172	0.000247385	0.000209038	0.0561824	0.000125585
	XJ-1-07	1.21687	0.000434207	0.708413	0.000212387	8.68176e-05	0.000206037	0.056367	0.000138102
	XJ-1-08	1.34804	0.000807797	0.708203	0.000179409	0.00156598	0.000670826	0.0562206	0.000123259
	XJ-1-09	1.35083	0.000628663	0.708068	0.000151252	0.000198995	0.000308774	0.0563226	0.00012063
	XJ-1-10	1.22644	0.000647134	0.708245	0.00019322	0.000713466	0.000459195	0.0564436	0.0001281
	XJ-1-11	1.11507	0.000359429	0.708268	0.000263442	0.00017733	0.000187968	0.0564304	0.000247302
	XJ-1-12	1.15588	0.000464503	0.708073	0.000185518	0.000166112	0.000254121	0.0559244	0.000132402
	XJ-1-13	1.20628	0.0004104	0.708479	0.000202956	4.19686e-05	0.000159492	0.056239	0.000134333
	XJ-1-14	0.909527	0.000453697	0.708385	0.000301838	0.000170763	0.000416306	0.0567454	0.000198951
	XJ-1-15	0.920587	0.000474688	0.70836	0.000287319	0.000532093	0.000541412	0.0560566	0.000181029
	XJ-1-16	0.883281	0.000415743	0.708169	0.00028184	1.74643e-05	0.000337131	0.056021	0.000208761
	XJ-1-17	0.88107	0.000431051	0.708292	0.000299409	0.000106925	0.000336786	0.0563932	0.000241585
	XJ-1-18	1.04521	0.000407052	0.708158	0.000249557	0.000122104	0.000164707	0.0565864	0.000194365
	XJ-1-19	1.16709	0.000466654	0.708385	0.000184252	0.000387536	0.000149434	0.0566095	0.000140913
	XJ-1-20	1.33329	0.000402633	0.708378	0.000175095	0.000103806	0.000120175	0.0561433	0.000126646
	XJ-1-21	1.24463	0.000395912	0.708379	0.000200393	0.000177233	0.000114843	0.0563309	0.000139204
	XJ-1-22	1.33006	0.000425132	0.708375	0.00016768	0.00019705	0.000108466	0.0566105	0.00011305
	XJ-1-23	1.28324	0.000361119	0.708302	0.000165719	2.10303e-05	8.20952e-05	0.0564833	0.000120086
	XJ-1-24	1.40148	0.000584517	0.708185	0.000146653	0.000586172	0.000307194	0.0562098	0.00010367
	XJ-1-25	1.4183	0.00046819	0.708113	0.000161538	4.91628e-05	0.000198867	0.0566853	0.000122922
	XJ-1-26	1.18162	0.000372529	0.708251	0.000180987	5.06501e-05	0.000126621	0.0566889	0.000147812
	XJ-1-27	1.08386	0.000436839	0.708388	0.000204822	0.000303282	0.000208166	0.0562192	0.000162505
	XJ-1-28	1.00794	0.000436257	0.708417	0.000216147	4.18258e-05	0.000215121	0.0563553	0.000157115
	XJ-1-29	1.04542	0.000452036	0.708186	0.000188988	0.000301205	0.000225035	0.0563203	0.000156742
	XJ-1-30	1.0467	0.000463359	0.708328	0.000224009	0.000280191	0.000239564	0.0561102	0.00015765
Line 2	XJ-1-31	1.03282	0.000388491	0.708392	0.00020692	0.000124249	0.000105549	0.0562357	0.000136404
	XJ-1-32	1.04472	0.000389546	0.708158	0.000209872	0.000156702	0.000132965	0.0561798	0.000150075
	XJ-1-33	1.05646	0.000385099	0.708232	0.000226003	6.38912e-05	0.000103854	0.0560021	0.000148489
	XJ-1-34	1.08568	0.000461707	0.708177	0.000212083	0.000337828	0.000210784	0.0565842	0.000141185
	XJ-1-35	1.10594	0.00039068	0.70816	0.00019288	6.14178e-05	0.000100165	0.0565232	0.000142651
	XJ-1-36	1.05216	0.00035494	0.708192	0.000212126	9.92137e-05	0.000172659	0.0565003	0.00014006
	XJ-1-37	1.12062	0.000369538	0.708092	0.000200945	5.37693e-05	9.44915e-05	0.056474	0.000139331
	XJ-1-38	1.02925	0.000413529	0.708316	0.00021536	0.000105221	0.000219752	0.0561174	0.000190242
	XJ-1-39	1.04231	0.000438083	0.708211	0.000211358	0.000193661	0.000234189	0.0563412	0.000147326
	XJ-1-40	1.08291	0.000369416	0.708225	0.000206507	0.00012526	0.000138973	0.0564674	0.000153388
	XJ-1-41	1.12079	0.000439922	0.708475	0.000247127	0.000228404	0.000217415	0.0564602	0.000121546
	XJ-1-42	1.09892	0.000370726	0.708552	0.000221815	0.000159262	0.000117276	0.056414	0.0001436
	XJ-1-43	1.07874	0.000376435	0.708492	0.000219472	0.000102319	0.000122804	0.0563946	0.000154855
	XJ-1-44	1.14299	0.0003391	0.708273	0.000186105	0.000105034	6.61486e-05	0.0566816	0.000132924
	XJ-1-45	1.18908	0.000359439	0.708394	0.000188974	2.32644e-05	9.79702e-05	0.0563813	0.000127716
	XJ-1-46	1.13166	0.00038974	0.708103	0.000196353	0.000105472	0.000143689	0.0562183	0.000139386
	XJ-1-47	1.16178	0.000372672	0.708072	0.000180558	3.4618e-05	8.38235e-05	0.0565806	0.000137789
	XJ-1-48	1.17371	0.000329399	0.708266	0.000213274	5.94343e-05	5.00833e-05	0.0564105	0.000134654
	XJ-1-49	1.15347	0.000416456	0.708135	0.000183843	0.000768991	0.000177878	0.0565273	0.000137673
	XJ-1-50	1.10271	0.000396488	0.708231	0.000217376	1.10423e-05	0.000129385	0.0561439	0.000154457
	XJ-1-51	1.09097	0.000387002	0.70804	0.000213676	7.30717e-05	0.000156362	0.05652	0.000146525
	XJ-1-52	1.09784	0.000357211	0.708251	0.000215772	0.000143346	9.85345e-05	0.0565959	0.000129747
	XJ-1-53	1.19617	0.000380655	0.708224	0.000230916	0.000138122	0.000177326	0.0565781	0.000169531
	XJ-1-54	1.05159	0.000350211	0.708401	0.000315763	8.63458e-05	0.000106239	0.0563412	0.000215321
	XJ-1-55	1.0656	0.000405437	0.708371	0.000331113	0.000172829	0.000235444	0.0561511	0.000212271
	XJ-1-56	1.09289	0.00273666	0.708391	0.000210221	0.0150435	0.00337595	0.0563951	0.00139786
	XJ-1-57	1.03691	0.000379868	0.708298	0.000275452	0.000104188	0.000255147	0.0562852	0.000231714
	XJ-1-58	1.04983	0.00036076	0.708178	0.000312287	8.86833e-05	0.000144054	0.056595	0.000262472
	XJ-1-59	1.03379	0.000325454	0.708391	0.000311859	0.000263759	7.90777e-05	0.0563915	0.000217328
	XJ-1-60	1.01548	0.000470615	0.708154	0.000358018	0.000145813	0.00047648	0.0565041	0.000273209
	XJ-1-61	1.02886	0.00040616	0.708241	0.000325792	0.000165367	0.000249707	0.0561515	0.000223764
	XJ-1-62	1.08515	0.000375193	0.708178	0.000266611	0.00114387	0.000868184	0.0562094	0.000214107
	XJ-1-63	1.20776	0.000379094	0.708242	0.000212784	7.84902e-05	0.000168764	0.0563998	0.000148714
	XJ-1-64	1.21656	0.000316064	0.708279	0.000199187	9.18192e-06	0.000149778	0.0566167	0.00015332
	XJ-1-65	1.08529	0.000319672	0.708409	0.000211759	0.000108056	6.96886e-05	0.0566241	0.000161316
Line 3	XJ-1-66	1.15373	0.000322735	0.708355	0.000200576	4.90166e-05	5.40602e-05	0.0564688	0.000129969
	XJ-1-67	1.11473	0.000315501	0.708251	0.000198949	0.000133807	4.79312e-05	0.0561553	0.000142845
	XJ-1-68	1.05029	0.000439409	0.708237	0.000200389	0.000628323	0.000437744	0.0562757	0.000149015
	XJ-1-69	1.16107	0.000341398	0.708204	0.000198256	0.000148482	8.36819e-05	0.0563696	0.000133804
	XJ-1-70	1.05619	0.000324449	0.70829	0.000218799	6.94738e-05	5.60795e-05	0.0565714	0.000135104
	XJ-1-71	1.05608	0.000345834	0.708147	0.000248311	2.58858e-05	9.57459e-05	0.05655	0.000147441
	XJ-1-72	1.13449	0.000344954	0.708353	0.000182105	3.84827e-05	8.53907e-05	0.0565707	0.000130265
	XJ-1-73	1.15778	0.000314255	0.708273	0.000187857	0.0001177	4.65994e-05	0.0560821	0.000135111
	XJ-1-74	1.10302	0.000480517	0.70816	0.000204304	0.000564611	0.000540307	0.0563382	0.000147657
	XJ-1-75	1.22604	0.000337334	0.708242	0.00018464	6.19783e-05	6.68333e-05	0.0566447	0.000149433
	XJ-1-76	1.27848	0.000333581	0.708098	0.000173199	2.75199e-05	5.60689e-05	0.0566134	0.000114851
	XJ-1-77	1.27848	0.000333581	0.708127	0.000167937	2.60594e-05	5.62772e-05	0.0566112	0.000115396
	XJ-1-78	1.20479	0.000317466	0.708398	0.000170794	2.49402e-05	4.92532e-05	0.0565746	0.000139237
	XJ-1-79	1.32988	0.000347901	0.708376	0.000170888	6.30975e-05	0.000145899	0.0565112	0.000125328
	XJ-1-80	1.38942	0.000353814	0.708202	0.000167828	1.20188e-05	0.000100787	0.0565522	0.000113802
	XJ-1-81	1.41083	0.000342889	0.708225	0.000187986	3.98867e-05	7.93331e-05	0.056725	0.000105571
	XJ-1-82	1.32493	0.000366195	0.708421	0.000166157	7.68556e-05	9.05759e-05	0.0564217	0.000121844
	XJ-1-83	1.33334	0.000362987	0.708375	0.000158387	0.000150906	0.000103392	0.0564383	0.000117453
	XJ-1-84	1.40157	0.000327512	0.708122	0.000160216	1.54471e-05	4.0733e-05	0.0564425	0.000108295
	XJ-1-85	1.34383	0.000325294	0.708156	0.000172127	5.47042e-05	6.34833e-05	0.0565411	0.000114193
	XJ-1-86	1.28333	0.000311218	0.70807	0.000182766	5.49601e-05	8.37506e-05	0.0563746	0.000122271
	XJ-1-87	1.30038	0.000329812	0.708274	0.000181175	0.000413205	7.07894e-05	0.0563719	0.000119923
	XJ-1-88	1.24835	0.000346478	0.708295	0.000187484	6.7775e-05	0.000119165	0.0563896	0.000133598
	XJ-1-89	1.19948	0.000327903	0.708398	0.000187213	3.52311e-05	7.1768e-05	0.0563827	0.000142214
	XJ-1-90	1.15676	0.000327926	0.708286	0.000203761	3.76528e-06	0.00010565	0.0563547	0.000127732
	XJ-1-91	1.1193	0.000298665	0.708272	0.000184183	8.98801e-05	8.31555e-05	0.0564893	0.000139603
	XJ-1-92	1.14537	0.000351074	0.708479	0.000211911	7.79472e-05	6.41035e-05	0.0561562	0.000139073
	XJ-1-93	1.28263	0.000357569	0.708353	0.000183302	8.30804e-05	9.92276e-05	0.0563999	0.000116898
	XJ-1-94	1.46507	0.000359983	0.70828	0.000168343	0.000107362	0.000111041	0.0563324	0.00010869
	XJ-1-95	1.30412	0.000334255	0.708156	0.000170586	5.71769e-05	6.29534e-05	0.0564244	0.000124581
standard	PZHPl-82um-01	1.90717	0.0127837	0.704341	5.50702e-05	0.0154372	0.000159045	0.0563465	3.51234e-05
	PZHPl-82um-02	3.12068	0.0167273	0.704308	3.85274e-05	0.0126616	0.000202456	0.0564405	2.00576e-05
	PZHPl-82um-03	2.60207	0.0239908	0.704355	4.49152e-05	0.0217688	0.000160159	0.0540837	4.60157e-05
	PZHPl-82um-04	2.72057	0.0146814	0.704383	4.0809e-05	0.0122595	0.000268562	0.0564336	2.17436e-05
	PZHPl-82um-06	1.96832	0.0334751	0.704296	4.91451e-05	0.0398277	0.000238372	0.0564774	3.5348e-05
	PZHPl-82um-07	2.60535	0.016966	0.704398	4.25298e-05	0.0148086	0.000324077	0.0564834	2.55127e-05
	PZHPl-82um-08	1.57933	0.0391963	0.704383	7.36318e-05	0.0568693	0.000626065	0.0566139	4.03797e-05
	PZHPl-82um-09	1.92833	0.0274946	0.704416	5.75462e-05	0.0330712	0.000203767	0.0566723	3.2814e-05
	PZHPl-82um-10	1.76459	0.0226652	0.704422	6.23451e-05	0.0297411	0.000108866	0.056506	3.48236e-05
	PZHPl-82um-11	2.41862	0.0107465	0.704423	4.95805e-05	0.0101829	0.000113837	0.056584	3.36664e-05
	NKT-1G-01	2.95298	0.10291	0.703497	4.36083e-05	0.0817095	0.00025872	0.0566764	1.86574e-05
	NKT-1G-02	2.49171	0.0872725	0.703535	5.85356e-05	0.081849	0.000213555	0.0567104	2.77239e-05
	NKT-1G-03	2.36959	0.0806922	0.703481	0.00121532	0.080344	0.000551553	0.057596	0.000646896
	NKT-1G-04	2.2869	0.0773205	0.703494	8.83952e-05	0.07908	0.000275062	0.0566347	3.41581e-05
	NKT-1G-05	2.26297	0.0776542	0.70344	5.32308e-05	0.0802253	0.000185682	0.0567443	2.87076e-05
	NKT-1G-06	2.35463	0.0830302	0.703528	5.37321e-05	0.0823786	0.000238103	0.0567549	2.81867e-05
@GUT
Line 4	XJ-1-01	1.35695	0.000190482	0.708374	0.000159852	0.000382987	0.000176251	0.0565789	0.000154474
	XJ-1-02	1.4664	0.000311664	0.708217	0.000156913	0.000670075	0.000218147	0.0566893	0.000128239
	XJ-1-03	1.3601	0.000191466	0.708196	0.000151951	0.000331122	0.000150656	0.0563396	0.000123745
	XJ-1-04	1.3191	0.000309448	0.708226	0.000157497	0.000653482	0.00023554	0.0564296	0.000141797
	XJ-1-05	1.18959	0.000862122	0.708074	0.000140442	0.00104853	0.000505338	0.0563056	0.000143366
	XJ-1-06	1.10097	0.000410703	0.708324	0.000187215	0.000626205	0.00014601	0.0569161	0.000172967
	XJ-1-07	1.30526	0.000317716	0.708131	0.000170771	0.000764448	0.000367507	0.0569736	0.000166573
	XJ-1-08	1.28112	0.00013991	0.708251	0.000161281	0.00029311	8.84667e-05	0.0564919	0.000151017
	XJ-1-09	1.25678	0.000218009	0.708026	0.000172922	0.000505652	0.000357952	0.0566382	0.000156989
	XJ-1-10	1.34616	0.000150333	0.708234	0.000168413	0.000248431	9.44654e-05	0.0567096	0.000133227
	XJ-1-11	1.27144	0.000217837	0.708293	0.000185142	0.000627634	0.000211896	0.0569084	0.000353809
	XJ-1-12	1.30708	0.000343877	0.708321	0.000186012	0.000806583	0.00089542	0.0567413	0.000185104
	XJ-1-13	1.23025	9.58112e-05	0.708393	0.000192216	0.000173094	7.67186e-05	0.0569235	0.00019178
	XJ-1-14	1.30141	0.000298353	0.708253	0.000186136	0.000762025	0.000396426	0.0568331	0.000180897
	XJ-1-15	1.30264	0.000140969	0.708169	0.000155476	0.000235711	0.000115601	0.0565729	0.000154345
	XJ-1-16	1.28237	9.39447e-05	0.708313	0.000134638	0.000104571	7.42019e-05	0.0565145	0.00019718
	XJ-1-17	1.52044	0.000393153	0.708237	0.000164798	0.000998988	0.000391715	0.0566069	0.000157781
	XJ-1-18	1.42881	0.000413621	0.70838	0.000179892	0.000268995	8.50971e-05	0.0567827	0.000160493
	XJ-1-19	1.57473	0.000130932	0.708363	0.000144862	0.000166053	6.42508e-05	0.0567518	0.000152698
	XJ-1-20	1.66549	0.000189468	0.708357	0.000139435	0.000277182	0.000133555	0.056712	0.000115134
	XJ-1-21	1.63845	0.000206553	0.708375	0.000138872	0.000319668	0.00011123	0.0568202	0.000139889
Line 5	XJ-1-22	1.18274	0.00014987	0.708341	0.000203093	0.000333503	0.000155541	0.0569474	0.000218976
	XJ-1-23	1.08169	0.000650642	0.708141	0.000237188	0.00179158	0.000842615	0.0512544	0.00271533
	XJ-1-24	1.21211	0.000358955	0.708282	0.000166534	0.00114141	0.000396246	0.056994	0.000222914
	XJ-1-25	1.33347	0.000252165	0.708246	0.00019796	0.000703958	0.000229283	0.0566277	0.00018631
	XJ-1-26	1.50218	0.000147165	0.708372	0.000146664	0.000298587	7.74614e-05	0.0565884	0.000155461
	XJ-1-27	1.46447	0.000154636	0.708348	0.000164547	0.000246137	0.00012387	0.0568291	0.000148519
	XJ-1-28	1.49075	0.000231763	0.708398	0.00013154	0.000488969	0.000166444	0.0567055	0.000135515
	XJ-1-29	1.6723	0.000630549	0.708313	0.000136046	0.00146401	0.000789039	0.0565122	0.000110769
	XJ-1-30	1.52973	0.000346289	0.70821	0.000148083	0.00067053	0.000329132	0.0564355	0.000127785
	XJ-1-31	1.44269	0.000148003	0.708271	0.000135337	0.00024993	9.73878e-05	0.0565906	0.000137726
	XJ-1-32	1.55222	0.000332482	0.708155	0.00013221	0.000724483	0.000306612	0.0566514	0.000123989
	XJ-1-33	1.51604	0.000154093	0.708275	0.000129739	0.000319347	9.4622e-05	0.0567042	0.000137256
	XJ-1-34	1.65148	0.000365937	0.70812	0.000138693	0.000738279	0.000230839	0.0567847	0.000134243
	XJ-1-35	1.54131	0.000500592	0.708323	0.000136207	0.000479057	0.000201524	0.0564502	0.000122483
	XJ-1-36	1.45837	0.000444402	0.708107	0.000154216	0.000533854	0.00039709	0.056603	0.000125596
	XJ-1-37	1.71983	9.22093e-05	0.708316	0.000136818	0.00013867	4.83197e-05	0.0565218	0.000133866
	XJ-1-38	1.66301	0.000312009	0.708148	0.000112756	0.00044453	0.000157226	0.056613	0.000108753
	XJ-1-39	1.70688	0.000117078	0.708075	0.000118334	0.000113589	5.33154e-05	0.0566908	0.000121436
	XJ-1-40	1.58957	0.000142012	0.708105	0.000122378	0.000206825	7.95408e-05	0.0562063	9.63528e-05
	XJ-1-41	1.62061	0.000266633	0.70815	0.00011119	0.000497147	0.000261837	0.0565498	0.00010918
	XJ-1-42	1.68505	0.000161558	0.708362	0.000107842	0.000147832	6.94851e-05	0.0564322	9.96691e-05
	XJ-1-43	1.70612	0.000423367	0.708126	0.000112374	0.000229671	5.98239e-05	0.0563576	8.54887e-05
	XJ-1-44	1.76349	0.000107469	0.70833	0.000127799	0.000109672	4.73438e-05	0.0566228	0.000106417
	XJ-1-45	1.53397	0.000131006	0.708265	0.000131917	0.000123935	4.5545e-05	0.0566994	0.000141689
	XJ-1-46	1.58627	0.000120359	0.708397	0.00012586	0.000199823	6.72213e-05	0.0566363	0.000123863
	XJ-1-47	1.63802	0.000140039	0.708374	0.000136251	7.15106e-05	8.87137e-05	0.0564312	0.000112756
	XJ-1-48	1.5749	0.000182989	0.708186	0.000147584	0.00024925	0.000113555	0.0566256	0.000123012
	XJ-1-49	1.6471	0.00020392	0.708342	0.000132874	0.000291438	0.000110908	0.0565479	0.000133551
	XJ-1-50	1.60487	0.000192493	0.708418	0.000141331	0.000255773	6.74869e-05	0.0564313	0.000112671
	XJ-1-51	1.63838	0.000140832	0.708296	0.00013554	0.000256112	8.45885e-05	0.0565532	0.000114782
	XJ-1-52	1.61784	0.000203731	0.708287	0.00015202	0.000368878	0.000116776	0.0566607	0.000113734
Line 6	XJ-1-53	1.46674	0.000346422	0.708353	0.000186142	0.000400951	0.000185483	0.0566121	0.000158256
	XJ-1-54	1.38486	0.000332932	0.708159	0.000178064	0.000519927	0.000241542	0.0567101	0.0001494
	XJ-1-55	1.354	0.000257099	0.708307	0.000186786	0.000284212	0.000152179	0.0564305	0.000132103
	XJ-1-56	1.42493	0.000299394	0.708268	0.000184078	0.000439465	0.000236923	0.0564939	0.000147462
	XJ-1-57	1.40483	0.000462964	0.708267	0.000176109	0.000466427	0.000240869	0.0564699	0.000143816
	XJ-1-58	1.51804	0.000322547	0.708296	0.000186154	0.000452958	0.000141352	0.0568353	0.0002199
	XJ-1-59	1.46714	0.000340344	0.708382	0.000181919	0.000531432	0.000453632	0.0566987	0.000159797
	XJ-1-60	1.41434	0.000208487	0.708249	0.000183283	0.000190559	0.000102958	0.0565446	0.000160728
	XJ-1-61	1.39991	0.000296344	0.708107	0.000179872	0.000434098	0.000279401	0.0566839	0.000158558
	XJ-1-62	1.52742	0.0002069	0.708223	0.000179054	0.000181192	8.67167e-05	0.0565644	0.000140742
	XJ-1-63	1.35761	0.000242746	0.708247	0.000167874	0.000500399	0.000154659	0.0566501	0.000229554
	XJ-1-64	1.40074	0.000377839	0.708263	0.000189395	0.000605538	0.000472173	0.0564974	0.000165781
	XJ-1-65	1.50008	0.000298811	0.708137	0.000195262	0.00017172	0.000106059	0.0567421	0.000166266
	XJ-1-66	1.43247	0.000262166	0.708289	0.000182257	0.000357141	0.000186404	0.0567269	0.000154447
	XJ-1-67	1.3881	0.000237031	0.70825	0.000175276	0.000217005	0.000142161	0.056621	0.000146337
	XJ-1-68	1.32414	0.000216903	0.708363	0.000196424	0.000170195	9.72238e-05	0.0565587	0.00018413
	XJ-1-69	1.5293	0.000399295	0.708304	0.000247955	0.000585909	0.00031358	0.056379	0.000185026
	XJ-1-70	1.62348	0.00110005	0.708371	0.000197735	0.00521534	0.00120553	0.0567084	0.000592442
	XJ-1-71	1.42311	0.000387147	0.708267	0.000219167	0.000687275	0.000387338	0.0564764	0.00103325
	XJ-1-72	1.32091	0.000303061	0.708272	0.000206085	0.000502426	0.000224618	0.056767	0.000200173
	XJ-1-73	1.33524	0.00026139	0.708337	0.00021623	0.000429128	0.000139864	0.0566131	0.000181175
	XJ-1-74	1.5883	0.00030889	0.708163	0.000252341	0.0002222	0.000276971	0.0565463	0.000214335
	XJ-1-75	1.53535	0.000236889	0.70831	0.000231144	0.000248336	0.000176373	0.0566427	0.000197086
	XJ-1-76	1.4192	0.000419199	0.708239	0.00021178	0.00114148	0.000625747	0.0564723	0.00102165
	XJ-1-77	1.36406	0.000456199	0.708279	0.000171788	0.000894637	0.00045135	0.0566353	0.000160799
	XJ-1-78	1.35992	0.000304839	0.708245	0.000181743	0.000461223	0.000236064	0.0565599	0.000155805
	XJ-1-79	1.43386	0.000204947	0.708351	0.000164587	0.000218858	8.15126e-05	0.056601	0.000151501
	XJ-1-80	1.50834	0.000243559	0.708205	0.000148379	0.00048531	0.000215241	0.0567402	0.000136254
	XJ-1-81	1.38684	0.000236197	0.708384	0.000153952	0.000285778	0.000105042	0.0566262	0.000134247
standard	PZHPl-44um-7Hz-01	1.03034	0.0512964	0.704445	0.000111022	0.163692	0.000202754	0.0565993	7.5062e-05
	PZHPl-44um-7Hz-02	1.18514	0.0525329	0.704414	9.39744e-05	0.145094	0.000456833	0.0567776	6.29591e-05
	PZHPl-60um-7Hz-03	2.31059	0.0180002	0.704367	6.09951e-05	0.0251748	0.000126538	0.0567824	3.5337e-05
	PZHPl-60um-7Hz-04	2.61931	0.0241544	0.704302	5.33074e-05	0.0298731	0.000154634	0.0568271	3.46265e-05
	PZHPl-60um-7Hz-05	1.94943	0.0471151	0.704293	6.59065e-05	0.0791836	0.000152275	0.0566478	3.96138e-05
	Coral-24um7Hz-01	4.14273	6.96136e-05	0.709109	4.52829e-05	3.27806e-05	7.32627e-06	0.0567857	2.23594e-05
	Coral-24um7Hz-02	4.31644	0.000113862	0.709114	4.52707e-05	3.59617e-05	8.79593e-06	0.0567916	2.16565e-05
	Coral-24um7Hz-03	3.39138	7.78991e-05	0.709106	5.40575e-05	1.05756e-05	8.83626e-06	0.0566701	2.16136e-05
	Coral-24um7Hz-04	4.25505	9.032e-05	0.709139	4.76469e-05	1.76784e-05	7.92538e-06	0.0566965	1.92314e-05
	Coral-24um7Hz-05	4.66348	6.14183e-05	0.709123	4.94033e-05	2.29947e-05	9.55128e-06	0.0567811	2.26355e-05
	Coral-24um7Hz-06	4.69341	6.55443e-05	0.709151	4.50765e-05	3.03657e-05	7.73107e-06	0.056711	2.02419e-05
	Coral-24um7Hz-07	4.49523	7.28778e-05	0.709125	4.57355e-05	3.30638e-05	7.55886e-06	0.0567311	2.29022e-05
	Coral-24um7Hz-08	5.16078	0.000136148	0.709165	4.40276e-05	6.48031e-05	6.72841e-06	0.056766	1.76726e-05
	Coral-24um7Hz-09	4.71679	4.33471e-05	0.709146	5.60062e-05	6.37046e-05	1.17578e-05	0.0568636	4.47778e-05
	NKT-1G-60um7Hz-01	2.6506	0.101452	0.703508	5.92898e-05	0.12579	0.000111303	0.0574859	2.99414e-05
	NKT-1G-60um7Hz-02	2.70634	0.101668	0.703598	5.47547e-05	0.123479	0.000222976	0.0575941	2.57741e-05
	NKT-1G-60um7Hz-03	2.76816	0.103817	0.703503	5.37323e-05	0.12353	0.00021628	0.0576262	3.21815e-05
